# Supplementary material for: A Genome-Wide Scan of Ashkenazi Jewish Crohn's Disease Suggests Novel Susceptibility Loci
Source: PLoS Genet. 2012 Mar 8;8(3):e1002559. doi: 10.1371/journal.pgen.1002559 (PMC3297573; doi:10.1371/journal.pgen.1002559)
Supplement: Table S2 — 175 SNPs selected for replication. Replication Region #: a region for replication containing ≥1 tag SNP (each region is also banded alternatively with white or blue color fill); dbSNP identifier: the unique rs identifier for each SNP (dbSNP 130/hg18); Chromosome and Physical position: the chromosomal and physical position of each SNP (hg18); Novel or Known region?; if variants the region has been previously associated with risk for CD in Franke et. al 2010 [24], noteworthy gene(s) in the region are listed, otherwise the region is indicated as “Novel”; Discovery GWAS p-value; reported p-value in the AJ panel for the discovery phase of this study; Minor allele; minor allele in the AJ panel; Frequency of the minor allele; frequency of the minor allele in all CD cases and controls; frequency is also given for CD cases, non-CD disease controls and controls stratified by cohort; Passed replication assay?; whether the SNPs was successfully genotyped on the Sequenom platform; Replication p-value; the p-value for association to CD in the replication panel; Replicated p<0.05; yes if the replication p-value<0.05; Combined p-value; the combined p-value for association for SNPs that passed replication via Fishers combined probability test of the discovery GWAS and replication p-values; SCAN-P; p-value for the same SNP in the discovery meta-analysis from the Franke et. al. study [24]. (XLS) [file pgen.1002559.s006.xls]

## Sheet: Sheet1
Replication Region #	dbSNP identifier	Chromosome	Physical position	Novel or Known region?	Discovery GWAS p-value	Minor allele	Frequency All Crohn's Cases n=737	Frequency All Crohn's Controls n=2,257	Frequency of NIDDK IBD Genetics Consortium CD Cases n=356	Frequency of Pediatrics IBD Consortium CD Cases n=109	Frequency of Mount Sinai School of Medicine I CD Cases n=109	Frequency of Mount Sinai School of Medicine II CD Cases n=173	Frequency of NIDDK IBD Genetics Consortium Controls n=410	Frequency of Mount Sinai School of Medicine I Controls n=58	Frequency of Mount Sinai School of Medicine II PD Cases n=151	Frequency of Mount Sinai School of Medicine II DYT Cases n=95	Frequency of John's Hopkins University SZC Cases n=537	Frequency of Albert Einstein College of Medicine Controls n=632	Frequency of Hebrew University of Jerusalem NIDDM Cases n=184	Frequency of Hebrew University of Jerusalem Controls n=190	Passed replication assay?	Replicatioin p-value	Replicated p<0.05	Combined p-value	Franke et al., 2010 p-value
1	rs2071986	1	7727795	VAMP3	6.6e-05	C	0.377 (0.353-0.403)	0.331 (0.317-0.345)	0.383 (0.347-0.42)	0.354 (0.29-0.421)	0.38 (0.316-0.449)	0.4 (0.348-0.454)	0.323 (0.291-0.355)	0.383 (0.288-0.485)	0.363 (0.309-0.42)	0.364 (0.298-0.435)	0.318 (0.29-0.347)	0.345 (0.32-0.372)	0.287 (0.243-0.334)	0.32 (0.275-0.369)	passed	0.1256	no		0.038
1	rs707467	1	7784271	VAMP3	1.41e-06	C	0.274 (0.252-0.298)	0.226 (0.214-0.238)	0.299 (0.265-0.334)	0.291 (0.232-0.356)	0.3 (0.24-0.366)	0.255 (0.21-0.304)	0.227 (0.2-0.257)	0.226 (0.149-0.319)	0.245 (0.197-0.297)	0.256 (0.197-0.322)	0.215 (0.191-0.241)	0.244 (0.221-0.268)	0.187 (0.15-0.228)	0.204 (0.166-0.247)	passed	0.23775	no		not assayed
1	rs228642	1	7785880	VAMP3	1.548e-05	G	0.408 (0.383-0.434)	0.344 (0.33-0.358)	0.426 (0.39-0.464)	0.404 (0.338-0.473)	0.385 (0.32-0.454)	0.407 (0.354-0.46)	0.33 (0.298-0.362)	0.363 (0.27-0.465)	0.386 (0.331-0.444)	0.33 (0.266-0.4)	0.337 (0.309-0.366)	0.367 (0.341-0.394)	0.287 (0.243-0.334)	0.349 (0.303-0.398)	passed	0.3301	no		0.004
1	rs2797685	1	7801650	VAMP3	1.27e-05	A	0.267 (0.245-0.291)	0.224 (0.212-0.236)	0.281 (0.248-0.315)	0.257 (0.201-0.321)	0.295 (0.236-0.361)	0.249 (0.204-0.298)	0.225 (0.197-0.254)	0.226 (0.149-0.319)	0.241 (0.194-0.293)	0.245 (0.187-0.31)	0.215 (0.191-0.241)	0.24 (0.217-0.264)	0.187 (0.15-0.228)	0.204 (0.166-0.247)	passed	0.259	no		2.7e-10
2	rs1004819	1	67442801	IL23R	3.711e-06	A	0.419 (0.394-0.445)	0.341 (0.328-0.356)	0.43 (0.394-0.468)	0.413 (0.347-0.482)	0.395 (0.33-0.464)	0.391 (0.34-0.445)	0.33 (0.298-0.362)	0.422 (0.325-0.524)	0.336 (0.283-0.393)	0.341 (0.276-0.411)	0.352 (0.323-0.382)	0.344 (0.318-0.37)	0.342 (0.296-0.391)	0.303 (0.258-0.35)	passed	1.181e-07	yes	4.38269e-13	1.1e-46
2	rs7517847	1	67454257	IL23R	4.793e-10	C	0.246 (0.225-0.269)	0.341 (0.328-0.356)	0.24 (0.209-0.273)	0.23 (0.176-0.292)	0.255 (0.199-0.319)	0.261 (0.216-0.311)	0.362 (0.33-0.395)	0.344 (0.252-0.445)	0.378 (0.323-0.436)	0.302 (0.239-0.37)	0.328 (0.3-0.358)	0.342 (0.316-0.369)	0.306 (0.261-0.354)	0.358 (0.311-0.407)	passed	1.886e-08	yes	9.0396e-18	1.6e-53
2	rs11209026	1	67478546	IL23R	9.421e-09	A	0.028 (0.021-0.038)	0.078 (0.07-0.086)	0.031 (0.02-0.047)	0.019 (0.006-0.047)	0.01 (0.002-0.035)	0.028 (0.013-0.051)	0.075 (0.058-0.094)	0.079 (0.034-0.151)	0.096 (0.065-0.135)	0.063 (0.034-0.106)	0.071 (0.057-0.088)	0.09 (0.075-0.107)	0.067 (0.045-0.096)	0.067 (0.045-0.097)	passed	1.59e-10	yes	1.49e-18	9.9e-65
3	rs3806234	1	151897695	Novel	3.242e-05	A	0.338 (0.314-0.363)	0.387 (0.373-0.402)	0.348 (0.313-0.384)	0.335 (0.273-0.402)	0.285 (0.227-0.35)	0.313 (0.264-0.364)	0.373 (0.341-0.406)	0.412 (0.316-0.514)	0.386 (0.331-0.444)	0.319 (0.255-0.388)	0.403 (0.374-0.433)	0.376 (0.35-0.403)	0.398 (0.349-0.448)	0.431 (0.382-0.481)	passed	0.2132	no		0.77
3	rs915178	1	154245349	SCAMP3, MUC1	5.737e-05	A	0.26 (0.238-0.284)	0.212 (0.2-0.224)	0.255 (0.224-0.289)	0.294 (0.235-0.359)	0.295 (0.236-0.361)	0.234 (0.19-0.282)	0.219 (0.192-0.248)	0.246 (0.166-0.341)	0.226 (0.18-0.277)	0.199 (0.147-0.261)	0.184 (0.161-0.208)	0.22 (0.198-0.243)	0.217 (0.178-0.261)	0.23 (0.19-0.275)	passed	0.2454	no		6.1e-08
4	rs7516312	1	211013542	Novel	8.774e-05	G	0.158 (0.14-0.178)	0.107 (0.099-0.117)	0.143 (0.119-0.171)	0.198 (0.147-0.257)	0.13 (0.089-0.183)	0.161 (0.124-0.204)	0.111 (0.091-0.134)	0.138 (0.078-0.22)	0.092 (0.062-0.131)	0.125 (0.083-0.179)	0.117 (0.098-0.138)	0.101 (0.085-0.119)	0.087 (0.061-0.119)	0.111 (0.082-0.146)	failed				not assayed
5	rs723504	2	12348891	Novel	2.135e-05	A	0.424 (0.399-0.45)	0.379 (0.365-0.393)	0.449 (0.412-0.486)	0.427 (0.36-0.496)	0.38 (0.316-0.449)	0.425 (0.372-0.479)	0.367 (0.335-0.401)	0.255 (0.174-0.352)	0.382 (0.327-0.44)	0.381 (0.314-0.452)	0.391 (0.362-0.421)	0.379 (0.353-0.406)	0.381 (0.333-0.431)	0.396 (0.348-0.446)	passed	0.01074	yes	2.29299e-07	0.61
6	rs1395	2	27278140	GCKR	5.487e-05	G	0.384 (0.36-0.41)	0.343 (0.329-0.357)	0.391 (0.355-0.428)	0.422 (0.356-0.491)	0.425 (0.359-0.494)	0.367 (0.316-0.42)	0.353 (0.321-0.386)	0.393 (0.297-0.495)	0.283 (0.233-0.337)	0.285 (0.223-0.352)	0.327 (0.299-0.356)	0.353 (0.327-0.379)	0.367 (0.32-0.417)	0.367 (0.319-0.416)	failed				0.58
7	rs1220210	2	34668257	Novel	7.859e-05	C	0.307 (0.284-0.332)	0.353 (0.339-0.368)	0.299 (0.265-0.334)	0.303 (0.243-0.369)	0.235 (0.181-0.298)	0.355 (0.305-0.408)	0.344 (0.312-0.376)	0.285 (0.199-0.383)	0.386 (0.331-0.444)	0.324 (0.26-0.394)	0.359 (0.33-0.388)	0.368 (0.341-0.395)	0.317 (0.272-0.365)	0.352 (0.305-0.401)	passed	0.3427	no		0.51
8	rs17421154	2	38590504	Novel	3.466e-05	A	0.473 (0.448-0.499)	0.428 (0.413-0.442)	0.486 (0.449-0.524)	0.491 (0.423-0.56)	0.485 (0.417-0.554)	0.461 (0.408-0.515)	0.416 (0.383-0.45)	0.451 (0.353-0.553)	0.451 (0.394-0.509)	0.461 (0.39-0.532)	0.423 (0.393-0.453)	0.424 (0.397-0.451)	0.403 (0.355-0.453)	0.468 (0.419-0.519)	passed	0.0674	no		0.036
9	rs7603548	2	43018651	Novel	2.168e-05	G	0.349 (0.325-0.374)	0.409 (0.394-0.423)	0.345 (0.31-0.381)	0.344 (0.282-0.412)	0.315 (0.254-0.382)	0.343 (0.293-0.396)	0.387 (0.354-0.421)	0.442 (0.343-0.544)	0.428 (0.371-0.486)	0.364 (0.298-0.435)	0.409 (0.379-0.439)	0.406 (0.38-0.434)	0.473 (0.423-0.523)	0.393 (0.345-0.443)	passed	0.19905	no		0.05
10	rs17041183	2	51083159	Novel	9.904e-05	T	0.042 (0.033-0.054)	0.061 (0.054-0.068)	0.041 (0.028-0.058)	0.037 (0.016-0.072)	0.06 (0.033-0.101)	0.037 (0.02-0.062)	0.066 (0.051-0.085)	0.05 (0.017-0.111)	0.073 (0.046-0.109)	0.04 (0.018-0.077)	0.055 (0.042-0.071)	0.067 (0.054-0.081)	0.056 (0.036-0.083)	0.05 (0.031-0.076)	passed	0.00819	yes	8.11138e-07	not assayed
11	rs17045898	2	54514299	Novel	2.027e-05	A	0.26 (0.238-0.284)	0.222 (0.21-0.235)	0.268 (0.236-0.302)	0.267 (0.209-0.331)	0.205 (0.154-0.265)	0.273 (0.227-0.323)	0.229 (0.201-0.258)	0.265 (0.182-0.362)	0.229 (0.183-0.281)	0.233 (0.177-0.298)	0.225 (0.201-0.252)	0.208 (0.187-0.231)	0.217 (0.178-0.261)	0.23 (0.19-0.275)	passed	0.15185	no		0.22
11	rs354211	2	54786020	Novel	7.94e-06	A	0.439 (0.414-0.465)	0.4 (0.385-0.414)	0.458 (0.421-0.496)	0.464 (0.396-0.532)	0.445 (0.378-0.514)	0.403 (0.351-0.457)	0.412 (0.379-0.446)	0.451 (0.353-0.553)	0.371 (0.316-0.428)	0.392 (0.325-0.464)	0.392 (0.362-0.422)	0.404 (0.377-0.431)	0.375 (0.328-0.425)	0.41 (0.362-0.46)	passed	0.4491	no		0.05
12	rs4643526	2	61038155	PUS10/REL	2.631e-05	A	0.318 (0.295-0.343)	0.278 (0.265-0.292)	0.337 (0.302-0.373)	0.253 (0.197-0.316)	0.365 (0.301-0.433)	0.291 (0.244-0.342)	0.296 (0.266-0.328)	0.304 (0.217-0.404)	0.249 (0.201-0.301)	0.256 (0.197-0.322)	0.274 (0.247-0.301)	0.288 (0.264-0.314)	0.256 (0.214-0.302)	0.271 (0.228-0.317)	passed	0.006185	yes	1.62727e-07	1.9e-07
12	rs13003464	2	61040333	PUS10/REL	1.976e-07	G	0.477 (0.452-0.503)	0.465 (0.45-0.48)	0.451 (0.415-0.489)	0.478 (0.41-0.546)	0.485 (0.417-0.554)	0.491 (0.438-0.545)	0.486 (0.453-0.52)	0.491 (0.39-0.592)	0.409 (0.353-0.467)	0.455 (0.385-0.526)	0.462 (0.431-0.492)	0.469 (0.442-0.497)	0.425 (0.377-0.476)	0.495 (0.445-0.545)	passed	0.024	yes	4.73e-09	7.2e-09
13	rs6545946	2	62567037	Novel	3.032e-06	A	0.202 (0.182-0.224)	0.249 (0.236-0.262)	0.208 (0.179-0.239)	0.198 (0.147-0.257)	0.2 (0.149-0.26)	0.188 (0.149-0.234)	0.247 (0.219-0.277)	0.246 (0.166-0.341)	0.298 (0.247-0.353)	0.245 (0.187-0.31)	0.258 (0.233-0.286)	0.239 (0.216-0.263)	0.267 (0.224-0.313)	0.201 (0.163-0.244)	passed	0.002312	yes	7.00998e-09	0.66
13	rs12989129	2	62573086	Novel	6.546e-05	A	0.109 (0.094-0.127)	0.147 (0.137-0.158)	0.121 (0.098-0.147)	0.097 (0.061-0.144)	0.09 (0.056-0.137)	0.11 (0.079-0.147)	0.153 (0.13-0.179)	0.128 (0.07-0.209)	0.145 (0.108-0.19)	0.148 (0.102-0.205)	0.155 (0.134-0.179)	0.142 (0.123-0.162)	0.159 (0.124-0.198)	0.125 (0.095-0.162)	passed	0.0818	no		0.51
14	rs10496431	2	109662949	Novel	2.789e-06	C	0.029 (0.022-0.039)	0.056 (0.049-0.063)	0.03 (0.019-0.045)	0.028 (0.01-0.061)	0 (0-0.017)	0.043 (0.024-0.07)	0.048 (0.035-0.065)	0 (0-0.036)	0.046 (0.025-0.077)	0.063 (0.034-0.106)	0.053 (0.041-0.069)	0.071 (0.057-0.086)	0.042 (0.025-0.067)	0.059 (0.038-0.086)	failed				not assayed
15	rs11123410	2	111673544	Novel	9.025e-05	G	0.477 (0.452-0.503)	0.434 (0.42-0.449)	0.471 (0.434-0.508)	0.386 (0.321-0.454)	0.45 (0.383-0.519)	0.491 (0.438-0.545)	0.421 (0.387-0.454)	0.412 (0.316-0.514)	0.439 (0.383-0.497)	0.444 (0.374-0.515)	0.438 (0.408-0.468)	0.417 (0.39-0.445)	0.456 (0.407-0.506)	0.428 (0.379-0.478)	passed	0.05385	no		0.0049
16	rs6733255	2	127378856	Novel	9.979e-07	G	0.071 (0.059-0.086)	0.042 (0.036-0.048)	0.076 (0.058-0.098)	0.083 (0.05-0.128)	0.065 (0.036-0.107)	0.052 (0.031-0.081)	0.044 (0.031-0.06)	0.05 (0.017-0.111)	0.039 (0.02-0.067)	0.035 (0.014-0.071)	0.033 (0.023-0.045)	0.045 (0.034-0.058)	0.05 (0.031-0.077)	0.053 (0.033-0.08)	passed	0.07385	no		0.38
17	rs747003	2	161624655	Novel	6.831e-06	G	0.308 (0.285-0.333)	0.359 (0.345-0.373)	0.303 (0.269-0.338)	0.363 (0.299-0.431)	0.28 (0.222-0.345)	0.303 (0.255-0.355)	0.355 (0.323-0.388)	0.295 (0.208-0.393)	0.325 (0.272-0.381)	0.313 (0.25-0.382)	0.353 (0.324-0.383)	0.351 (0.325-0.378)	0.406 (0.358-0.456)	0.419 (0.37-0.469)	passed	0.01597	yes	1.09091e-07	0.54
17	rs2884364	2	161685893	Novel	1.483e-05	A	0.308 (0.285-0.333)	0.356 (0.342-0.37)	0.296 (0.263-0.331)	0.367 (0.303-0.435)	0.28 (0.222-0.345)	0.307 (0.258-0.358)	0.352 (0.32-0.385)	0.295 (0.208-0.393)	0.321 (0.269-0.377)	0.307 (0.244-0.376)	0.348 (0.32-0.378)	0.349 (0.324-0.376)	0.395 (0.347-0.445)	0.431 (0.382-0.481)	failed				0.12
18	rs1510094	2	162197437	Novel	4.836e-05	A	0.202 (0.182-0.224)	0.171 (0.16-0.182)	0.219 (0.189-0.251)	0.179 (0.131-0.237)	0.195 (0.145-0.254)	0.185 (0.146-0.23)	0.169 (0.144-0.195)	0.108 (0.055-0.187)	0.229 (0.183-0.281)	0.188 (0.136-0.249)	0.169 (0.147-0.193)	0.174 (0.154-0.195)	0.159 (0.124-0.198)	0.155 (0.121-0.194)	passed	0.37865	no		0.74
18	rs4408743	2	162220542	Novel	5.964e-06	G	0.128 (0.112-0.147)	0.1 (0.092-0.11)	0.138 (0.113-0.165)	0.129 (0.087-0.181)	0.135 (0.093-0.188)	0.113 (0.081-0.151)	0.089 (0.071-0.11)	0.04 (0.011-0.098)	0.13 (0.094-0.174)	0.137 (0.093-0.192)	0.104 (0.087-0.124)	0.105 (0.089-0.123)	0.081 (0.056-0.112)	0.096 (0.069-0.13)	failed				not assayed
19	rs4500910	2	171158599	Novel	1.955e-05	G	0.142 (0.125-0.161)	0.187 (0.176-0.199)	0.129 (0.106-0.156)	0.175 (0.127-0.232)	0.15 (0.106-0.205)	0.113 (0.081-0.151)	0.166 (0.142-0.192)	0.138 (0.078-0.22)	0.149 (0.111-0.195)	0.182 (0.132-0.243)	0.173 (0.151-0.198)	0.236 (0.213-0.26)	0.164 (0.129-0.204)	0.169 (0.134-0.21)	passed	0.31535	no		0.55
20	rs1477500	2	181218415	Novel	3.933e-05	G	0.199 (0.179-0.221)	0.242 (0.229-0.254)	0.19 (0.162-0.22)	0.17 (0.123-0.227)	0.17 (0.123-0.227)	0.194 (0.154-0.24)	0.285 (0.255-0.316)	0.226 (0.149-0.319)	0.26 (0.211-0.313)	0.205 (0.151-0.267)	0.233 (0.208-0.26)	0.238 (0.215-0.262)	0.223 (0.183-0.267)	0.218 (0.179-0.262)	passed	0.43695	no		0.56
21	rs2241880	2	233848107	ATG16L1	2.877e-06	A	0.323 (0.3-0.348)	0.379 (0.365-0.393)	0.31 (0.276-0.345)	0.344 (0.282-0.412)	0.32 (0.259-0.387)	0.328 (0.279-0.38)	0.379 (0.346-0.412)	0.373 (0.279-0.475)	0.386 (0.331-0.444)	0.33 (0.266-0.4)	0.387 (0.358-0.417)	0.382 (0.355-0.409)	0.395 (0.347-0.445)	0.346 (0.3-0.395)	passed	5.2e-07	yes	1.44e-12	1.7e-40
22	rs908078	3	4999771	Novel	9.698e-05	G	0.167 (0.149-0.188)	0.218 (0.206-0.23)	0.174 (0.147-0.204)	0.17 (0.123-0.227)	0.14 (0.097-0.194)	0.164 (0.127-0.207)	0.208 (0.181-0.236)	0.206 (0.133-0.298)	0.176 (0.135-0.224)	0.245 (0.187-0.31)	0.217 (0.193-0.243)	0.243 (0.22-0.267)	0.187 (0.15-0.228)	0.207 (0.168-0.25)	passed	0.0040435	yes	3.92139e-07	0.0036
22	rs11920786	3	5004354	Novel	2.549e-05	A	0.137 (0.12-0.156)	0.176 (0.165-0.188)	0.124 (0.1-0.15)	0.147 (0.103-0.201)	0.125 (0.085-0.177)	0.155 (0.118-0.198)	0.15 (0.127-0.176)	0.206 (0.133-0.298)	0.153 (0.115-0.199)	0.211 (0.156-0.274)	0.182 (0.159-0.206)	0.196 (0.175-0.219)	0.153 (0.119-0.192)	0.157 (0.123-0.197)	passed	0.002849	yes	7.2621e-08	not assayed
23	rs13059346	3	21336788	Novel	1.311e-05	G	0.038 (0.029-0.05)	0.019 (0.016-0.024)	0.04 (0.027-0.057)	0.046 (0.022-0.084)	0.04 (0.018-0.076)	0.025 (0.011-0.047)	0.026 (0.016-0.039)	0 (0-0.036)	0.02 (0.007-0.043)	0.012 (0.002-0.039)	0.022 (0.014-0.033)	0.016 (0.01-0.025)	0.023 (0.01-0.043)	0.021 (0.009-0.04)	passed	0.1957	no		0.27
23	rs13070110	3	21368252	Novel	6.501e-05	G	0.123 (0.107-0.141)	0.09 (0.082-0.099)	0.116 (0.094-0.142)	0.136 (0.093-0.189)	0.15 (0.106-0.205)	0.119 (0.087-0.158)	0.096 (0.077-0.117)	0.108 (0.055-0.187)	0.073 (0.046-0.109)	0.052 (0.025-0.092)	0.098 (0.081-0.117)	0.09 (0.075-0.106)	0.07 (0.047-0.1)	0.102 (0.074-0.136)	passed	0.0602	no		not assayed
23	rs9873271	3	21410993	Novel	2.86e-05	C	0.051 (0.041-0.064)	0.028 (0.023-0.033)	0.045 (0.031-0.063)	0.065 (0.036-0.107)	0.045 (0.022-0.083)	0.055 (0.033-0.085)	0.03 (0.02-0.044)	0.03 (0.005-0.087)	0.035 (0.017-0.063)	0.012 (0.002-0.039)	0.029 (0.02-0.041)	0.029 (0.02-0.039)	0.023 (0.01-0.043)	0.027 (0.013-0.048)	passed	0.19825	no		0.26
24	rs1389155	3	28140666	Novel	4.643e-06	C	0.307 (0.284-0.332)	0.26 (0.247-0.273)	0.317 (0.283-0.353)	0.326 (0.264-0.393)	0.33 (0.268-0.397)	0.31 (0.261-0.361)	0.257 (0.228-0.287)	0.275 (0.191-0.373)	0.268 (0.219-0.321)	0.239 (0.182-0.304)	0.251 (0.225-0.278)	0.264 (0.24-0.289)	0.298 (0.253-0.345)	0.239 (0.198-0.284)	passed	0.032735	yes	1.51989e-07	not assayed
25	rs17685418	3	62173375	Novel	8.991e-05	G	0.149 (0.132-0.169)	0.114 (0.105-0.124)	0.155 (0.129-0.183)	0.129 (0.087-0.181)	0.185 (0.136-0.244)	0.134 (0.1-0.174)	0.097 (0.078-0.119)	0.089 (0.042-0.161)	0.119 (0.085-0.161)	0.114 (0.074-0.167)	0.115 (0.096-0.136)	0.131 (0.113-0.15)	0.092 (0.066-0.125)	0.12 (0.09-0.156)	failed				0.12
26	rs4075188	3	69336810	Novel	6.559e-06	A	0.056 (0.045-0.069)	0.084 (0.076-0.093)	0.051 (0.036-0.07)	0.023 (0.008-0.053)	0.065 (0.036-0.107)	0.04 (0.022-0.066)	0.093 (0.074-0.114)	0.099 (0.049-0.173)	0.096 (0.065-0.135)	0.091 (0.055-0.14)	0.074 (0.059-0.092)	0.077 (0.063-0.093)	0.092 (0.066-0.125)	0.096 (0.069-0.13)	passed	0.24595	no		0.84
27	rs2947705	3	127038360	Novel	1.117e-05	A	0.256 (0.234-0.28)	0.213 (0.201-0.225)	0.199 (0.171-0.231)	0.198 (0.147-0.257)	0.245 (0.19-0.308)	0.207 (0.165-0.253)	0.22 (0.193-0.25)	0.236 (0.157-0.33)	0.207 (0.162-0.257)	0.205 (0.151-0.267)	0.226 (0.202-0.253)	0.2 (0.179-0.223)	0.206 (0.168-0.249)	0.207 (0.168-0.25)	failed				not assayed
28	rs12631386	3	135283161	Novel	4.18e-05	G	0.212 (0.192-0.234)	0.17 (0.16-0.182)	0.219 (0.189-0.251)	0.202 (0.151-0.262)	0.225 (0.172-0.287)	0.207 (0.165-0.253)	0.16 (0.136-0.186)	0.216 (0.141-0.309)	0.184 (0.142-0.232)	0.182 (0.132-0.243)	0.158 (0.137-0.182)	0.183 (0.162-0.205)	0.156 (0.122-0.195)	0.169 (0.134-0.21)	passed	0.3234	no		0.42
29	rs1863392	3	188794712	Novel	9.812e-05	C	0.213 (0.193-0.235)	0.174 (0.163-0.185)	0.213 (0.184-0.245)	0.179 (0.131-0.237)	0.245 (0.19-0.308)	0.207 (0.165-0.253)	0.185 (0.16-0.213)	0.157 (0.093-0.243)	0.145 (0.108-0.19)	0.188 (0.136-0.249)	0.177 (0.155-0.201)	0.179 (0.158-0.201)	0.164 (0.129-0.204)	0.16 (0.126-0.2)	passed	0.2368	no		0.71
30	rs17358384	4	12129840	Novel	5.114e-05	G	0.09 (0.076-0.106)	0.06 (0.054-0.068)	0.083 (0.064-0.106)	0.129 (0.087-0.181)	0.075 (0.044-0.119)	0.082 (0.056-0.117)	0.057 (0.042-0.074)	0.03 (0.005-0.087)	0.039 (0.02-0.067)	0.091 (0.055-0.14)	0.059 (0.046-0.075)	0.071 (0.058-0.087)	0.059 (0.038-0.087)	0.044 (0.026-0.069)	passed	0.27535	no		0.57
31	rs1948616	4	62170283	Novel	9.547e-05	G	0.263 (0.241-0.287)	0.319 (0.306-0.333)	0.265 (0.233-0.299)	0.221 (0.168-0.282)	0.29 (0.231-0.356)	0.285 (0.238-0.336)	0.309 (0.278-0.341)	0.324 (0.234-0.424)	0.287 (0.236-0.341)	0.341 (0.276-0.411)	0.313 (0.286-0.342)	0.316 (0.291-0.343)	0.337 (0.29-0.385)	0.364 (0.317-0.413)	failed				0.62
31	rs10004368	4	62178920	Novel	6.292e-05	G	0.241 (0.22-0.264)	0.298 (0.284-0.311)	0.24 (0.209-0.273)	0.216 (0.163-0.277)	0.265 (0.208-0.329)	0.267 (0.221-0.317)	0.275 (0.245-0.306)	0.314 (0.225-0.414)	0.287 (0.236-0.341)	0.33 (0.266-0.4)	0.293 (0.266-0.322)	0.294 (0.27-0.32)	0.303 (0.259-0.351)	0.352 (0.305-0.401)	passed	0.23745	no		0.57
31	rs1378353	4	63010943	Novel	7.152e-05	A	0.44 (0.415-0.466)	0.498 (0.484-0.513)	0.443 (0.406-0.48)	0.478 (0.41-0.546)	0.38 (0.316-0.449)	0.461 (0.408-0.515)	0.486 (0.453-0.52)	0.432 (0.334-0.534)	0.443 (0.386-0.501)	0.489 (0.418-0.56)	0.472 (0.442-0.503)	0.486 (0.459-0.514)	0.448 (0.398-0.498)	0.471 (0.422-0.522)	failed				0.021
32	rs11938536	4	71298780	Novel	2.08e-05	C	0.385 (0.361-0.411)	0.323 (0.31-0.337)	0.398 (0.362-0.435)	0.372 (0.308-0.44)	0.36 (0.297-0.428)	0.4 (0.348-0.454)	0.3 (0.27-0.332)	0.363 (0.27-0.465)	0.313 (0.262-0.369)	0.296 (0.234-0.364)	0.322 (0.294-0.351)	0.338 (0.312-0.364)	0.345 (0.298-0.394)	0.314 (0.269-0.363)	passed	0.018855	yes	3.92184e-07	not assayed
33	rs1691275	4	75545502	Novel	9.932e-05	G	0.034 (0.026-0.045)	0.017 (0.014-0.021)	0.037 (0.024-0.053)	0.034 (0.014-0.068)	0.035 (0.015-0.07)	0.031 (0.015-0.055)	0.013 (0.007-0.023)	0.02 (0.003-0.07)	0.02 (0.007-0.043)	0.023 (0.007-0.055)	0.018 (0.011-0.028)	0.018 (0.011-0.027)	0.02 (0.009-0.039)	0.009 (0.002-0.025)	failed				not assayed
34	rs17049579	4	138568314	Novel	7.664e-05	A	0.1 (0.086-0.117)	0.138 (0.128-0.149)	0.092 (0.071-0.115)	0.115 (0.076-0.165)	0.115 (0.076-0.166)	0.103 (0.073-0.141)	0.127 (0.105-0.151)	0.236 (0.157-0.33)	0.161 (0.121-0.207)	0.16 (0.112-0.218)	0.128 (0.109-0.15)	0.137 (0.119-0.157)	0.145 (0.112-0.183)	0.131 (0.1-0.168)	passed	0.2564	no		0.12
35	rs2710835	4	169654700	Novel	7.647e-05	C	0.287 (0.265-0.311)	0.324 (0.31-0.338)	0.3 (0.267-0.335)	0.289 (0.23-0.355)	0.245 (0.19-0.308)	0.267 (0.221-0.317)	0.293 (0.263-0.325)	0.334 (0.243-0.434)	0.329 (0.276-0.385)	0.358 (0.292-0.429)	0.347 (0.319-0.377)	0.302 (0.278-0.328)	0.328 (0.282-0.377)	0.358 (0.311-0.407)	failed				not assayed
36	rs1908801	4	190176763	Novel	1.294e-05	G	0.276 (0.254-0.3)	0.232 (0.22-0.245)	0.302 (0.268-0.337)	0.284 (0.225-0.349)	0.23 (0.176-0.292)	0.3 (0.253-0.352)	0.279 (0.249-0.31)	0.197 (0.125-0.287)	0.199 (0.155-0.249)	0.25 (0.192-0.316)	0.224 (0.2-0.251)	0.208 (0.187-0.231)	0.275 (0.232-0.322)	0.23 (0.19-0.275)	passed	0.39205	no		not assayed
37	rs899552	5	5138460	Novel	2.776e-05	A	0.446 (0.421-0.472)	0.484 (0.469-0.499)	0.468 (0.431-0.506)	0.455 (0.387-0.523)	0.38 (0.316-0.449)	0.464 (0.411-0.518)	0.468 (0.435-0.502)	0.451 (0.353-0.553)	0.447 (0.39-0.505)	0.472 (0.402-0.543)	0.48 (0.449-0.51)	0.491 (0.463-0.518)	0.492 (0.442-0.542)	0.477 (0.427-0.527)	passed	0.2525	no		0.65
38	rs6886032	5	20928038	Novel	5.659e-05	A	0.311 (0.288-0.336)	0.255 (0.242-0.268)	0.265 (0.233-0.299)	0.331 (0.269-0.398)	0.405 (0.34-0.474)	0.3 (0.253-0.352)	0.269 (0.24-0.3)	0.314 (0.225-0.414)	0.222 (0.176-0.273)	0.199 (0.147-0.261)	0.247 (0.222-0.274)	0.254 (0.23-0.278)	0.287 (0.243-0.334)	0.253 (0.211-0.299)	failed				not assayed
39	rs2135064	5	26813823	Novel	3.004e-05	G	0.334 (0.31-0.359)	0.401 (0.387-0.416)	0.32 (0.286-0.355)	0.377 (0.312-0.445)	0.34 (0.278-0.408)	0.397 (0.346-0.451)	0.388 (0.356-0.422)	0.373 (0.279-0.475)	0.378 (0.323-0.436)	0.432 (0.363-0.504)	0.416 (0.387-0.447)	0.396 (0.369-0.423)	0.373 (0.325-0.422)	0.442 (0.393-0.493)	passed	0.2549	no		not assayed
40	rs4091500	5	30633449	Novel	8.433e-05	A	0.085 (0.072-0.101)	0.118 (0.109-0.128)	0.073 (0.055-0.095)	0.111 (0.072-0.16)	0.105 (0.068-0.154)	0.079 (0.053-0.113)	0.099 (0.08-0.12)	0.118 (0.062-0.198)	0.107 (0.075-0.148)	0.074 (0.042-0.12)	0.12 (0.102-0.142)	0.151 (0.132-0.171)	0.112 (0.082-0.147)	0.076 (0.052-0.107)	failed				not assayed
41	rs4957261	5	40307927	PTGER4	3.342e-06	A	0.253 (0.231-0.277)	0.318 (0.305-0.332)	0.247 (0.216-0.28)	0.331 (0.269-0.398)	0.22 (0.167-0.282)	0.255 (0.21-0.304)	0.299 (0.268-0.331)	0.304 (0.217-0.404)	0.367 (0.312-0.424)	0.33 (0.266-0.4)	0.287 (0.26-0.315)	0.341 (0.316-0.368)	0.337 (0.29-0.385)	0.317 (0.272-0.366)	passed	0.02467	yes	8.24471e-08	not assayed
41	rs9292777	5	40473705	PTGER	6.92e-05	C	0.407 (0.382-0.433)	0.376 (0.362-0.391)	0.313 (0.279-0.348)	0.39 (0.325-0.459)	0.275 (0.217-0.34)	0.343 (0.293-0.396)	0.358 (0.326-0.391)	0.334 (0.243-0.434)	0.386 (0.331-0.444)	0.341 (0.276-0.411)	0.371 (0.342-0.401)	0.4 (0.373-0.427)	0.409 (0.36-0.459)	0.341 (0.294-0.389)	passed	9.1203e-07	yes	2.13e-11	not assayed
42	rs10053166	5	60877967	Novel	3.946e-05	G	0.166 (0.148-0.187)	0.227 (0.215-0.239)	0.191 (0.163-0.222)	0.152 (0.107-0.207)	0.135 (0.093-0.188)	0.182 (0.143-0.227)	0.223 (0.196-0.253)	0.246 (0.166-0.341)	0.226 (0.18-0.277)	0.16 (0.112-0.218)	0.242 (0.217-0.269)	0.227 (0.204-0.25)	0.217 (0.178-0.261)	0.221 (0.182-0.265)	passed	0.2029	no		0.39
43	rs4466170	5	84202798	Novel	4.999e-05	A	0.215 (0.195-0.237)	0.263 (0.25-0.276)	0.189 (0.161-0.219)	0.19 (0.14-0.248)	0.22 (0.167-0.282)	0.228 (0.185-0.276)	0.237 (0.209-0.267)	0.304 (0.217-0.404)	0.245 (0.197-0.297)	0.245 (0.187-0.31)	0.273 (0.246-0.3)	0.278 (0.254-0.303)	0.217 (0.178-0.261)	0.291 (0.247-0.338)	passed	0.1466	no		not assayed
44	rs7705924	5	101974697	Novel	3.769e-05	G	0.095 (0.081-0.112)	0.07 (0.062-0.077)	0.097 (0.076-0.121)	0.078 (0.046-0.123)	0.07 (0.04-0.113)	0.125 (0.092-0.164)	0.083 (0.066-0.104)	0.059 (0.021-0.126)	0.062 (0.037-0.095)	0.08 (0.047-0.126)	0.069 (0.054-0.085)	0.058 (0.046-0.072)	0.081 (0.056-0.112)	0.079 (0.054-0.11)	passed	0.0004723	yes	1.7801e-08	0.58
45	rs10066153	5	123883295	Novel	3.454e-05	T	0.368 (0.344-0.394)	0.31 (0.296-0.324)	0.395 (0.359-0.432)	0.363 (0.299-0.431)	0.34 (0.278-0.408)	0.358 (0.308-0.411)	0.345 (0.313-0.378)	0.255 (0.174-0.352)	0.298 (0.247-0.353)	0.216 (0.162-0.28)	0.316 (0.288-0.345)	0.306 (0.281-0.332)	0.328 (0.282-0.377)	0.288 (0.244-0.335)	passed	0.29445	no		0.14
46	rs10520079	5	129847937	Novel	5.411e-05	A	0.259 (0.237-0.283)	0.203 (0.191-0.215)	0.248 (0.217-0.282)	0.234 (0.18-0.297)	0.275 (0.217-0.34)	0.276 (0.23-0.327)	0.192 (0.167-0.22)	0.197 (0.125-0.287)	0.191 (0.149-0.24)	0.188 (0.136-0.249)	0.224 (0.2-0.251)	0.189 (0.168-0.211)	0.206 (0.168-0.249)	0.233 (0.193-0.278)	passed	0.0581	no		not assayed
47	rs17674015	5	131389677	Novel	2.828e-05	A	0.316 (0.293-0.341)	0.253 (0.24-0.266)	0.299 (0.265-0.334)	0.271 (0.213-0.335)	0.305 (0.245-0.371)	0.34 (0.29-0.393)	0.25 (0.221-0.28)	0.216 (0.141-0.309)	0.241 (0.194-0.293)	0.262 (0.203-0.328)	0.277 (0.251-0.305)	0.231 (0.209-0.255)	0.281 (0.238-0.328)	0.253 (0.211-0.299)	passed	0.005375	yes	1.52005e-07	2.3e-08
47	rs3091338	5	131430637	IL3, ACSL6, P4HA2, PDLIM4, SLC22A4	4.861e-05	T	0.375 (0.351-0.401)	0.308 (0.294-0.321)	0.353 (0.318-0.39)	0.344 (0.282-0.412)	0.37 (0.306-0.438)	0.388 (0.337-0.442)	0.314 (0.283-0.346)	0.236 (0.157-0.33)	0.279 (0.229-0.333)	0.319 (0.255-0.388)	0.33 (0.302-0.359)	0.278 (0.254-0.303)	0.325 (0.28-0.374)	0.352 (0.305-0.401)	passed	0.00092	yes	4.47e-08	5.6e-12
48	rs12517249	5	145767452	Novel	6.691e-05	C	0.11 (0.095-0.128)	0.151 (0.141-0.162)	0.114 (0.092-0.14)	0.124 (0.084-0.176)	0.09 (0.056-0.137)	0.103 (0.073-0.141)	0.152 (0.128-0.178)	0.069 (0.029-0.137)	0.142 (0.104-0.186)	0.177 (0.127-0.236)	0.139 (0.119-0.162)	0.165 (0.145-0.186)	0.162 (0.127-0.201)	0.146 (0.113-0.184)	passed	0.37705	no		0.85
49	rs2609857	5	167037247	Novel	1.677e-05	A	0.073 (0.061-0.088)	0.043 (0.037-0.05)	0.097 (0.076-0.121)	0.06 (0.032-0.101)	0.035 (0.015-0.07)	0.058 (0.036-0.088)	0.052 (0.038-0.069)	0.01 (0.001-0.054)	0.046 (0.025-0.077)	0.046 (0.021-0.085)	0.04 (0.029-0.054)	0.046 (0.035-0.059)	0.034 (0.018-0.057)	0.038 (0.022-0.062)	passed	0.07495	no		0.59
50	rs315756	5	169702667	Novel	8.11e-06	G	0.093 (0.079-0.109)	0.059 (0.053-0.067)	0.092 (0.071-0.115)	0.092 (0.057-0.139)	0.06 (0.033-0.101)	0.1 (0.071-0.137)	0.05 (0.036-0.066)	0.04 (0.011-0.098)	0.054 (0.031-0.086)	0.046 (0.021-0.085)	0.066 (0.052-0.082)	0.057 (0.045-0.071)	0.075 (0.052-0.106)	0.07 (0.047-0.1)	passed	0.4631	no		0.08
51	rs17064468	5	174429444	Novel	4.911e-05	T	0.082 (0.069-0.098)	0.066 (0.059-0.074)	0.092 (0.071-0.115)	0.06 (0.032-0.101)	0.095 (0.06-0.143)	0.073 (0.048-0.106)	0.068 (0.052-0.087)	0.069 (0.029-0.137)	0.073 (0.046-0.109)	0.08 (0.047-0.126)	0.069 (0.054-0.085)	0.057 (0.045-0.071)	0.07 (0.047-0.1)	0.073 (0.05-0.103)	passed	0.44015	no		not assayed
52	rs13168072	5	180002458	Novel	7.56e-05	G	0.308 (0.285-0.333)	0.27 (0.257-0.283)	0.342 (0.307-0.378)	0.253 (0.197-0.316)	0.32 (0.259-0.387)	0.307 (0.258-0.358)	0.296 (0.266-0.328)	0.236 (0.157-0.33)	0.222 (0.176-0.273)	0.228 (0.172-0.292)	0.238 (0.212-0.264)	0.264 (0.241-0.289)	0.325 (0.28-0.374)	0.341 (0.294-0.389)	passed	0.3548	no		not assayed
53	rs7758530	6	16780152	Novel	4.659e-06	G	0.096 (0.082-0.113)	0.064 (0.057-0.072)	0.094 (0.074-0.118)	0.102 (0.065-0.15)	0.105 (0.068-0.154)	0.1 (0.071-0.137)	0.061 (0.046-0.079)	0.079 (0.034-0.151)	0.054 (0.031-0.086)	0.08 (0.047-0.126)	0.058 (0.045-0.074)	0.062 (0.05-0.077)	0.084 (0.059-0.115)	0.067 (0.045-0.097)	failed				not assayed
53	rs10484365	6	16791651	Novel	4.855e-05	A	0.079 (0.066-0.094)	0.056 (0.049-0.063)	0.075 (0.057-0.096)	0.06 (0.032-0.101)	0.11 (0.072-0.16)	0.091 (0.063-0.127)	0.055 (0.041-0.072)	0.069 (0.029-0.137)	0.058 (0.034-0.09)	0.069 (0.038-0.113)	0.052 (0.039-0.066)	0.053 (0.042-0.067)	0.07 (0.047-0.1)	0.05 (0.031-0.076)	passed	0.020785	yes	1.00911e-06	0.78
54	rs2235383	6	29801478	HLA	5.165e-05	G	0.202 (0.182-0.224)	0.161 (0.15-0.172)	0.187 (0.159-0.217)	0.207 (0.155-0.267)	0.265 (0.208-0.329)	0.213 (0.171-0.26)	0.15 (0.127-0.176)	0.118 (0.062-0.198)	0.149 (0.111-0.195)	0.165 (0.117-0.224)	0.155 (0.133-0.178)	0.176 (0.156-0.198)	0.15 (0.117-0.189)	0.181 (0.144-0.222)	passed	0.0015845	yes	8.18394e-08	0.099
54	rs9258260	6	29831140	HLA	2.193e-05	A	0.138 (0.121-0.157)	0.103 (0.094-0.112)	0.129 (0.106-0.156)	0.156 (0.111-0.212)	0.185 (0.136-0.244)	0.137 (0.102-0.178)	0.093 (0.074-0.114)	0.099 (0.049-0.173)	0.088 (0.059-0.126)	0.097 (0.06-0.146)	0.099 (0.082-0.118)	0.111 (0.095-0.129)	0.087 (0.061-0.119)	0.14 (0.107-0.178)	passed	7.92e-06	yes	1.746e-10	0.21
54	rs2245961	6	30051983	HLA	3.281e-05	C	0.445 (0.42-0.471)	0.391 (0.377-0.406)	0.44 (0.403-0.478)	0.422 (0.356-0.491)	0.48 (0.412-0.549)	0.446 (0.393-0.5)	0.379 (0.346-0.412)	0.432 (0.334-0.534)	0.355 (0.301-0.412)	0.404 (0.336-0.475)	0.372 (0.343-0.402)	0.4 (0.373-0.427)	0.431 (0.382-0.481)	0.41 (0.362-0.46)	passed	0.0005895	yes	1.93415e-08	0.06
54	rs404860	6	32292323	HLA	2.05e-06	G	0.257 (0.235-0.281)	0.202 (0.19-0.214)	0.248 (0.217-0.282)	0.225 (0.172-0.287)	0.285 (0.227-0.35)	0.279 (0.233-0.33)	0.211 (0.184-0.239)	0.177 (0.109-0.265)	0.214 (0.169-0.265)	0.233 (0.177-0.298)	0.19 (0.167-0.215)	0.192 (0.171-0.214)	0.2 (0.162-0.243)	0.236 (0.195-0.281)	passed	0.001275	yes	2.61375e-09	2e-07
54	rs3129871	6	32514320	HLA	3.099e-05	A	0.378 (0.354-0.404)	0.318 (0.304-0.332)	0.362 (0.326-0.398)	0.386 (0.321-0.454)	0.445 (0.378-0.514)	0.382 (0.331-0.436)	0.318 (0.287-0.351)	0.353 (0.261-0.455)	0.298 (0.247-0.353)	0.392 (0.325-0.464)	0.31 (0.282-0.338)	0.307 (0.282-0.333)	0.312 (0.266-0.36)	0.346 (0.3-0.395)	failed				4.9e-07
54	rs4713630	6	33580919	HLA	6.936e-06	T	0.121 (0.105-0.139)	0.078 (0.071-0.087)	0.121 (0.098-0.147)	0.088 (0.054-0.133)	0.125 (0.085-0.177)	0.107 (0.076-0.144)	0.072 (0.056-0.091)	0.04 (0.011-0.098)	0.062 (0.037-0.095)	0.086 (0.051-0.133)	0.077 (0.062-0.095)	0.087 (0.072-0.104)	0.087 (0.061-0.119)	0.082 (0.057-0.113)	passed	0.036105	yes	2.50424e-07	0.019
54	rs4713633	6	33585118	HLA	3.062e-05	G	0.118 (0.102-0.136)	0.078 (0.07-0.086)	0.117 (0.094-0.143)	0.088 (0.054-0.133)	0.12 (0.08-0.171)	0.107 (0.076-0.144)	0.071 (0.054-0.09)	0.04 (0.011-0.098)	0.054 (0.031-0.086)	0.086 (0.051-0.133)	0.077 (0.062-0.095)	0.087 (0.072-0.104)	0.087 (0.061-0.119)	0.082 (0.057-0.113)	failed				0.017
55	rs9370479	6	56045230	Novel	4.629e-05	A	0.496 (0.471-0.522)	0.445 (0.431-0.46)	0.498 (0.46-0.535)	0.496 (0.428-0.564)	0.495 (0.427-0.564)	0.479 (0.426-0.533)	0.444 (0.411-0.478)	0.442 (0.343-0.544)	0.47 (0.413-0.528)	0.478 (0.407-0.549)	0.455 (0.425-0.486)	0.432 (0.405-0.459)	0.448 (0.398-0.498)	0.431 (0.382-0.481)	failed				0.096
56	rs2322840	6	81319660	Novel	6.217e-05	A	0.42 (0.395-0.446)	0.36 (0.346-0.374)	0.425 (0.389-0.462)	0.386 (0.321-0.454)	0.43 (0.364-0.499)	0.407 (0.354-0.46)	0.353 (0.321-0.386)	0.285 (0.199-0.383)	0.371 (0.316-0.428)	0.353 (0.287-0.423)	0.348 (0.32-0.378)	0.368 (0.342-0.395)	0.353 (0.306-0.402)	0.402 (0.353-0.452)	passed	0.042655	yes	2.65186e-06	not assayed
57	rs164548	6	94128329	Novel	3.309e-05	A	0.2 (0.18-0.222)	0.16 (0.149-0.171)	0.201 (0.172-0.232)	0.193 (0.143-0.252)	0.235 (0.181-0.298)	0.207 (0.165-0.253)	0.15 (0.127-0.176)	0.118 (0.062-0.198)	0.199 (0.155-0.249)	0.171 (0.122-0.23)	0.153 (0.132-0.176)	0.158 (0.139-0.179)	0.195 (0.157-0.237)	0.149 (0.115-0.188)	passed	0.26805	no		0.0091
58	rs7765008	6	96476953	Novel	4.856e-05	G	0.141 (0.124-0.16)	0.173 (0.163-0.185)	0.134 (0.11-0.161)	0.129 (0.087-0.181)	0.175 (0.127-0.233)	0.146 (0.11-0.188)	0.164 (0.14-0.191)	0.197 (0.125-0.287)	0.161 (0.121-0.207)	0.182 (0.132-0.243)	0.168 (0.146-0.192)	0.182 (0.161-0.204)	0.164 (0.129-0.204)	0.184 (0.147-0.225)	passed	0.4244	no		0.023
59	rs6937332	6	105197813	Novel	2.358e-05	A	0.2 (0.18-0.222)	0.16 (0.15-0.171)	0.216 (0.186-0.248)	0.21 (0.158-0.27)	0.225 (0.172-0.287)	0.188 (0.149-0.234)	0.205 (0.179-0.234)	0.148 (0.085-0.232)	0.153 (0.115-0.199)	0.154 (0.107-0.211)	0.152 (0.131-0.175)	0.151 (0.132-0.171)	0.159 (0.124-0.198)	0.14 (0.107-0.178)	passed	0.02691	yes	6.34538e-07	not assayed
60	rs11753013	6	112997794	Novel	6.559e-05	C	0.072 (0.06-0.087)	0.103 (0.094-0.112)	0.067 (0.05-0.088)	0.082 (0.049-0.126)	0.075 (0.044-0.119)	0.07 (0.046-0.102)	0.087 (0.069-0.108)	0.079 (0.034-0.151)	0.1 (0.068-0.139)	0.108 (0.069-0.16)	0.117 (0.098-0.138)	0.105 (0.089-0.123)	0.109 (0.08-0.144)	0.082 (0.057-0.113)	failed				not assayed
61	rs11153615	6	116997886	Novel	4.681e-05	A	0.421 (0.396-0.447)	0.483 (0.468-0.497)	0.407 (0.37-0.444)	0.496 (0.428-0.564)	0.365 (0.301-0.433)	0.446 (0.393-0.5)	0.478 (0.444-0.512)	0.432 (0.334-0.534)	0.493 (0.435-0.551)	0.5 (0.43-0.571)	0.474 (0.444-0.504)	0.487 (0.46-0.515)	0.495 (0.445-0.545)	0.439 (0.39-0.49)	failed				not assayed
62	rs1544839	6	124812128	Novel	6.687e-05	C	0.17 (0.152-0.191)	0.199 (0.188-0.211)	0.181 (0.154-0.211)	0.184 (0.135-0.242)	0.125 (0.085-0.177)	0.137 (0.102-0.178)	0.22 (0.193-0.25)	0.197 (0.125-0.287)	0.172 (0.131-0.22)	0.165 (0.117-0.224)	0.197 (0.174-0.222)	0.197 (0.176-0.22)	0.195 (0.157-0.237)	0.213 (0.174-0.256)	passed	0.11935	no		0.024
63	rs10484716	6	128217415	Novel	2.103e-05	G	0.181 (0.162-0.202)	0.144 (0.134-0.155)	0.184 (0.156-0.214)	0.198 (0.147-0.257)	0.2 (0.149-0.26)	0.2 (0.16-0.247)	0.149 (0.126-0.175)	0.167 (0.101-0.254)	0.145 (0.108-0.19)	0.154 (0.107-0.211)	0.145 (0.125-0.168)	0.146 (0.127-0.166)	0.148 (0.114-0.186)	0.111 (0.082-0.146)	passed	0.42615	no		0.041
64	rs9285465	6	129775909	Novel	4.82e-05	T	0.444 (0.419-0.47)	0.484 (0.469-0.498)	0.437 (0.401-0.475)	0.436 (0.369-0.505)	0.445 (0.378-0.514)	0.428 (0.375-0.482)	0.498 (0.464-0.532)	0.442 (0.343-0.544)	0.497 (0.439-0.555)	0.461 (0.39-0.532)	0.469 (0.439-0.5)	0.486 (0.459-0.514)	0.473 (0.423-0.523)	0.498 (0.447-0.548)	passed	0.1954	no		0.74
65	rs2226067	6	147032738	Novel	7.423e-06	A	0.287 (0.265-0.311)	0.249 (0.237-0.262)	0.282 (0.249-0.317)	0.244 (0.188-0.306)	0.345 (0.283-0.413)	0.303 (0.255-0.355)	0.236 (0.208-0.266)	0.226 (0.149-0.319)	0.279 (0.229-0.333)	0.267 (0.208-0.334)	0.233 (0.208-0.26)	0.256 (0.233-0.281)	0.259 (0.217-0.305)	0.256 (0.214-0.302)	passed	0.13855	no		0.074
66	rs9498349	6	149798048	Novel	2.763e-05	G	0.155 (0.137-0.175)	0.124 (0.114-0.134)	0.166 (0.139-0.195)	0.133 (0.091-0.186)	0.17 (0.123-0.227)	0.149 (0.113-0.191)	0.119 (0.099-0.143)	0.089 (0.042-0.161)	0.145 (0.108-0.19)	0.114 (0.074-0.167)	0.125 (0.106-0.147)	0.125 (0.108-0.144)	0.134 (0.102-0.171)	0.111 (0.082-0.146)	failed				not assayed
67	rs4725235	7	1587380	Novel	7.815e-05	G	0.255 (0.233-0.279)	0.293 (0.28-0.307)	0.254 (0.222-0.288)	0.253 (0.197-0.316)	0.175 (0.127-0.233)	0.258 (0.213-0.308)	0.262 (0.233-0.293)	0.216 (0.141-0.309)	0.287 (0.236-0.341)	0.245 (0.187-0.31)	0.323 (0.295-0.352)	0.304 (0.279-0.33)	0.298 (0.253-0.345)	0.282 (0.239-0.329)	passed	0.38975	no		not assayed
68	rs3757575	7	45162260	Novel	8.383e-05	A	0.246 (0.225-0.269)	0.204 (0.193-0.216)	0.25 (0.219-0.284)	0.223 (0.17-0.285)	0.215 (0.163-0.276)	0.297 (0.25-0.349)	0.183 (0.157-0.21)	0.265 (0.182-0.362)	0.207 (0.162-0.257)	0.228 (0.172-0.292)	0.237 (0.212-0.263)	0.195 (0.174-0.218)	0.17 (0.134-0.21)	0.184 (0.147-0.225)	passed	0.1091	no		not assayed
69	rs3912439	7	95233617	Novel	1.827e-05	A	0.07 (0.058-0.085)	0.105 (0.096-0.114)	0.071 (0.053-0.092)	0.065 (0.036-0.107)	0.08 (0.048-0.125)	0.049 (0.029-0.077)	0.092 (0.073-0.113)	0.128 (0.07-0.209)	0.096 (0.065-0.135)	0.142 (0.097-0.199)	0.098 (0.081-0.117)	0.118 (0.101-0.136)	0.092 (0.066-0.125)	0.102 (0.074-0.136)	passed	0.06295	no		0.45
70	rs41269	7	105407033	Novel	3.513e-05	T	0.104 (0.089-0.121)	0.078 (0.07-0.086)	0.104 (0.083-0.129)	0.088 (0.054-0.133)	0.075 (0.044-0.119)	0.146 (0.11-0.188)	0.073 (0.057-0.093)	0.079 (0.034-0.151)	0.088 (0.059-0.126)	0.08 (0.047-0.126)	0.079 (0.064-0.097)	0.078 (0.064-0.094)	0.062 (0.04-0.09)	0.091 (0.064-0.123)	passed	0.1878	no		0.33
71	rs2293281	7	109006939	Novel	4.185e-05	T	0.33 (0.307-0.355)	0.379 (0.365-0.393)	0.311 (0.278-0.347)	0.349 (0.286-0.417)	0.335 (0.273-0.402)	0.343 (0.293-0.396)	0.393 (0.36-0.426)	0.383 (0.288-0.485)	0.355 (0.301-0.412)	0.387 (0.319-0.458)	0.402 (0.373-0.432)	0.356 (0.33-0.383)	0.373 (0.325-0.422)	0.367 (0.319-0.416)	passed	0.0749	no		0.13
72	rs10487301	7	110476229	Novel	2.393e-05	G	0.298 (0.275-0.323)	0.263 (0.251-0.277)	0.292 (0.259-0.327)	0.239 (0.184-0.301)	0.34 (0.278-0.408)	0.364 (0.313-0.417)	0.275 (0.245-0.306)	0.255 (0.174-0.352)	0.294 (0.244-0.349)	0.25 (0.192-0.316)	0.27 (0.244-0.298)	0.249 (0.226-0.273)	0.237 (0.196-0.281)	0.285 (0.242-0.332)	passed	0.2869	no		0.024
72	rs757219	7	110509718	Novel	8.069e-05	G	0.318 (0.295-0.343)	0.284 (0.271-0.297)	0.314 (0.28-0.35)	0.271 (0.213-0.335)	0.35 (0.287-0.418)	0.373 (0.322-0.427)	0.299 (0.268-0.331)	0.285 (0.199-0.383)	0.306 (0.254-0.361)	0.262 (0.203-0.328)	0.294 (0.267-0.323)	0.263 (0.239-0.288)	0.256 (0.214-0.302)	0.32 (0.275-0.369)	passed	0.12485	no		0.034
73	rs11136435	8	1779092	Novel	3.445e-05	G	0.442 (0.417-0.468)	0.374 (0.36-0.389)	0.449 (0.412-0.486)	0.39 (0.325-0.459)	0.415 (0.349-0.484)	0.443 (0.39-0.497)	0.355 (0.323-0.388)	0.461 (0.362-0.563)	0.359 (0.305-0.416)	0.404 (0.336-0.475)	0.389 (0.36-0.419)	0.368 (0.341-0.395)	0.375 (0.328-0.425)	0.367 (0.319-0.416)	failed				0.3
74	rs10100238	8	59125348	Novel	1.938e-05	G	0.492 (0.467-0.518)	0.429 (0.415-0.444)	0.484 (0.446-0.521)	0.45 (0.383-0.519)	0.48 (0.412-0.549)	0.485 (0.431-0.539)	0.437 (0.404-0.471)	0.383 (0.288-0.485)	0.355 (0.301-0.412)	0.381 (0.314-0.452)	0.433 (0.403-0.464)	0.449 (0.422-0.477)	0.498 (0.448-0.548)	0.349 (0.303-0.398)	passed	0.07585	no		0.8
75	rs4625030	8	62612820	Novel	3.441e-05	G	0.047 (0.037-0.06)	0.077 (0.069-0.085)	0.051 (0.036-0.07)	0.051 (0.026-0.089)	0.045 (0.022-0.083)	0.052 (0.031-0.081)	0.079 (0.062-0.099)	0.059 (0.021-0.126)	0.081 (0.053-0.117)	0.086 (0.051-0.133)	0.074 (0.059-0.092)	0.068 (0.055-0.083)	0.084 (0.059-0.115)	0.099 (0.072-0.133)	passed	0.1795	no		0.6
76	rs12677663	8	74169901	Novel	9.461e-07	C	0.301 (0.278-0.326)	0.351 (0.337-0.365)	0.282 (0.249-0.317)	0.344 (0.282-0.412)	0.295 (0.236-0.361)	0.282 (0.235-0.333)	0.327 (0.296-0.359)	0.304 (0.217-0.404)	0.348 (0.294-0.405)	0.319 (0.255-0.388)	0.357 (0.328-0.386)	0.361 (0.335-0.388)	0.375 (0.328-0.425)	0.352 (0.305-0.401)	passed	0.02075	yes	1.96316e-08	0.037
77	rs10974788	9	4785595	Novel	6.869e-05	A	0.116 (0.101-0.134)	0.14 (0.13-0.151)	0.108 (0.086-0.133)	0.166 (0.119-0.222)	0.065 (0.036-0.107)	0.091 (0.063-0.127)	0.156 (0.132-0.182)	0.187 (0.117-0.276)	0.104 (0.072-0.144)	0.177 (0.127-0.236)	0.14 (0.12-0.163)	0.148 (0.129-0.169)	0.092 (0.066-0.125)	0.131 (0.1-0.168)	passed	0.18755	no		0.31
78	rs7861755	9	5263180	JAK2	1.539e-05	G	0.434 (0.409-0.46)	0.481 (0.466-0.496)	0.432 (0.395-0.469)	0.422 (0.356-0.491)	0.445 (0.378-0.514)	0.403 (0.351-0.457)	0.457 (0.423-0.491)	0.481 (0.381-0.582)	0.485 (0.428-0.543)	0.461 (0.39-0.532)	0.499 (0.468-0.529)	0.49 (0.462-0.517)	0.428 (0.379-0.478)	0.474 (0.424-0.525)	passed	0.14395	no		not assayed
79	rs7047641	9	8423698	Novel	8.117e-05	G	0.419 (0.394-0.445)	0.469 (0.454-0.483)	0.433 (0.396-0.47)	0.386 (0.321-0.454)	0.435 (0.369-0.504)	0.428 (0.375-0.482)	0.428 (0.394-0.462)	0.461 (0.362-0.563)	0.489 (0.431-0.547)	0.483 (0.413-0.555)	0.455 (0.425-0.486)	0.493 (0.466-0.521)	0.462 (0.412-0.512)	0.46 (0.41-0.51)	failed				not assayed
80	rs263795	9	70195938	Novel	3.06e-05	G	0.323 (0.3-0.348)	0.374 (0.36-0.388)	0.303 (0.269-0.338)	0.289 (0.23-0.355)	0.27 (0.213-0.335)	0.388 (0.337-0.442)	0.362 (0.33-0.395)	0.314 (0.225-0.414)	0.386 (0.331-0.444)	0.353 (0.287-0.423)	0.376 (0.347-0.405)	0.394 (0.367-0.421)	0.342 (0.296-0.391)	0.37 (0.322-0.419)	failed				not assayed
81	rs4744776	9	77720158	Novel	9.156e-05	A	0.186 (0.167-0.207)	0.153 (0.142-0.163)	0.177 (0.15-0.207)	0.184 (0.135-0.242)	0.18 (0.132-0.238)	0.203 (0.162-0.25)	0.187 (0.161-0.214)	0.079 (0.034-0.151)	0.161 (0.121-0.207)	0.12 (0.078-0.173)	0.145 (0.125-0.168)	0.141 (0.122-0.161)	0.175 (0.14-0.216)	0.155 (0.121-0.194)	failed				not assayed
82	rs16922173	9	104568708	Novel	8.103e-05	T	0.004 (0.002-0.009)	0.02 (0.016-0.024)	0 (0-0.006)	0 (0-0.017)	0.015 (0.004-0.043)	0.007 (0.001-0.022)	0.003 (0.001-0.01)	0.03 (0.005-0.087)	0.031 (0.015-0.058)	0.046 (0.021-0.085)	0.021 (0.014-0.032)	0.033 (0.024-0.044)	0 (0-0.01)	0 (0-0.01)	passed	0.01177	yes	9.53723e-07	not assayed
83	rs528811	9	111900442	Novel	2.194e-05	T	0.178 (0.159-0.199)	0.142 (0.132-0.153)	0.167 (0.141-0.197)	0.161 (0.115-0.217)	0.2 (0.149-0.26)	0.188 (0.149-0.234)	0.143 (0.121-0.169)	0.216 (0.141-0.309)	0.126 (0.091-0.169)	0.125 (0.083-0.179)	0.137 (0.117-0.159)	0.144 (0.125-0.164)	0.15 (0.117-0.189)	0.137 (0.105-0.175)	passed	0.06395	no		not assayed
84	rs1836108	9	113030674	Novel	7.937e-05	C	0.306 (0.283-0.331)	0.348 (0.334-0.362)	0.302 (0.268-0.337)	0.294 (0.235-0.359)	0.33 (0.268-0.397)	0.297 (0.25-0.349)	0.355 (0.323-0.388)	0.295 (0.208-0.393)	0.359 (0.305-0.416)	0.336 (0.271-0.405)	0.351 (0.323-0.381)	0.354 (0.328-0.381)	0.325 (0.28-0.374)	0.343 (0.297-0.392)	passed	0.0888	no		not assayed
85	rs17250694	9	138940677	CARD9	9.244e-05	D	0.303 (0.28-0.328)	0.343 (0.329-0.357)	0.278 (0.245-0.312)	0.365 (0.301-0.433)	0.3 (0.24-0.366)	0.285 (0.238-0.336)	0.346 (0.315-0.379)	0.393 (0.297-0.495)	0.321 (0.269-0.377)	0.296 (0.234-0.364)	0.351 (0.323-0.381)	0.353 (0.327-0.379)	0.345 (0.298-0.394)	0.297 (0.253-0.344)	failed				not assayed
86	rs17543787	10	13764337	Novel	3.365e-05	G	0.423 (0.398-0.449)	0.484 (0.469-0.499)	0.4 (0.364-0.437)	0.441 (0.374-0.51)	0.355 (0.292-0.423)	0.482 (0.429-0.536)	0.405 (0.372-0.439)	0.451 (0.353-0.553)	0.478 (0.42-0.536)	0.483 (0.413-0.555)	0.472 (0.442-0.503)	0.494 (0.466-0.521)	0.428 (0.379-0.478)	0.451 (0.402-0.501)	passed	0.44485	no		0.15
87	rs2462443	10	57675638	Novel	7.606e-05	A	0.235 (0.214-0.258)	0.28 (0.267-0.293)	0.229 (0.198-0.261)	0.267 (0.209-0.331)	0.235 (0.181-0.298)	0.24 (0.196-0.289)	0.271 (0.241-0.302)	0.236 (0.157-0.33)	0.298 (0.247-0.353)	0.285 (0.223-0.352)	0.269 (0.243-0.297)	0.276 (0.252-0.301)	0.306 (0.261-0.354)	0.314 (0.269-0.363)	passed	0.018055	yes	1.37326e-06	0.91
88	rs7922793	10	62496958	Novel	5.522e-07	G	0.325 (0.302-0.35)	0.383 (0.369-0.398)	0.334 (0.299-0.37)	0.326 (0.264-0.393)	0.29 (0.231-0.356)	0.276 (0.23-0.327)	0.397 (0.364-0.43)	0.363 (0.27-0.465)	0.386 (0.331-0.444)	0.336 (0.271-0.405)	0.386 (0.357-0.416)	0.391 (0.364-0.418)	0.367 (0.32-0.417)	0.364 (0.317-0.413)	passed	0.0692	no		0.33
88	rs7087951	10	62512608	Novel	5.372e-05	A	0.422 (0.397-0.448)	0.469 (0.455-0.484)	0.422 (0.386-0.459)	0.459 (0.392-0.528)	0.385 (0.32-0.454)	0.361 (0.31-0.414)	0.477 (0.443-0.511)	0.461 (0.362-0.563)	0.451 (0.394-0.509)	0.421 (0.352-0.492)	0.475 (0.445-0.505)	0.481 (0.454-0.509)	0.464 (0.415-0.515)	0.442 (0.393-0.493)	passed	0.06185	no		0.34
89	rs7076156	10	64085190	ZNF365	1.86e-05	A	0.241 (0.22-0.264)	0.284 (0.271-0.298)	0.229 (0.198-0.261)	0.271 (0.213-0.335)	0.24 (0.185-0.303)	0.228 (0.185-0.276)	0.292 (0.262-0.323)	0.236 (0.157-0.33)	0.264 (0.215-0.317)	0.233 (0.177-0.298)	0.283 (0.256-0.311)	0.289 (0.265-0.315)	0.275 (0.232-0.322)	0.32 (0.275-0.369)	passed	0.0004015	yes	7.4679e-09	7.1e-09
89	rs10761659	10	64115570	ZNF365	9.306e-06	A	0.409 (0.384-0.435)	0.453 (0.439-0.468)	0.391 (0.355-0.428)	0.427 (0.36-0.496)	0.375 (0.311-0.443)	0.397 (0.346-0.451)	0.449 (0.415-0.483)	0.442 (0.343-0.544)	0.47 (0.413-0.528)	0.427 (0.357-0.498)	0.449 (0.419-0.48)	0.461 (0.434-0.488)	0.442 (0.393-0.492)	0.466 (0.416-0.516)	failed				4.4e-22
90	rs2279227	10	85994853	Novel	2.859e-05	G	0.448 (0.423-0.474)	0.496 (0.481-0.51)	0.446 (0.409-0.483)	0.422 (0.356-0.491)	0.5 (0.432-0.569)	0.416 (0.363-0.47)	0.481 (0.447-0.515)	0.432 (0.334-0.534)	0.489 (0.431-0.547)	0.483 (0.413-0.555)	0.481 (0.45-0.511)	0.472 (0.445-0.5)	0.473 (0.423-0.523)	0.477 (0.427-0.527)	passed	0.0983	no		0.8
91	rs11190141	10	101282380	NKX2-3	9.8e-05	A	0.263 (0.241-0.287)	0.31 (0.298-0.322)	0.271 (0.241-0.312)	0.231 (0.177-0.293)	0.249 (0.193-0.313)	0.262 (0.207-0.328)	0.318 (0.286-0.352)	0.314 (0.225-0.414)	0.31 (0.246-0.379)	0.302 (0.239-0.37)	0.307 (0.278-0.336)	0.321 (0.296-0.348)	0.3 (0.256-0.348)	0.271 (0.228-0.317)	passed	0.02005	yes	1.9649e-06	not assayed
92	rs3780950	10	111631696	Novel	9.888e-05	A	0.15 (0.133-0.17)	0.191 (0.179-0.202)	0.138 (0.113-0.165)	0.147 (0.103-0.201)	0.16 (0.114-0.216)	0.185 (0.146-0.23)	0.199 (0.173-0.228)	0.177 (0.109-0.265)	0.172 (0.131-0.22)	0.125 (0.083-0.179)	0.185 (0.162-0.209)	0.206 (0.184-0.229)	0.192 (0.155-0.234)	0.181 (0.144-0.222)	passed	0.321	no		0.55
93	rs10734105	10	133062109	Novel	9.802e-05	G	0.342 (0.318-0.367)	0.391 (0.376-0.405)	0.363 (0.328-0.4)	0.311 (0.25-0.377)	0.295 (0.236-0.361)	0.3 (0.253-0.352)	0.395 (0.363-0.429)	0.383 (0.288-0.485)	0.39 (0.334-0.447)	0.353 (0.287-0.423)	0.391 (0.362-0.421)	0.399 (0.372-0.426)	0.398 (0.349-0.448)	0.364 (0.317-0.413)	passed	0.000391	yes	7.29e-09	not assayed
94	rs741738	11	299508	Novel	6.06e-05	A	0.301 (0.278-0.326)	0.269 (0.256-0.282)	0.309 (0.275-0.344)	0.294 (0.235-0.359)	0.315 (0.254-0.382)	0.279 (0.233-0.33)	0.295 (0.264-0.326)	0.255 (0.174-0.352)	0.249 (0.201-0.301)	0.313 (0.25-0.382)	0.257 (0.231-0.284)	0.263 (0.239-0.288)	0.256 (0.214-0.302)	0.282 (0.239-0.329)	failed				not assayed
95	rs7925089	11	3087994	Novel	5.261e-05	A	0.423 (0.398-0.449)	0.475 (0.46-0.49)	0.443 (0.406-0.48)	0.418 (0.352-0.486)	0.345 (0.283-0.413)	0.385 (0.334-0.439)	0.492 (0.458-0.526)	0.334 (0.243-0.434)	0.42 (0.364-0.478)	0.444 (0.374-0.515)	0.467 (0.437-0.498)	0.492 (0.465-0.52)	0.481 (0.431-0.531)	0.498 (0.447-0.548)	failed				0.52
96	rs728528	11	10533973	Novel	9.957e-05	C	0.388 (0.364-0.414)	0.352 (0.338-0.366)	0.391 (0.355-0.428)	0.422 (0.356-0.491)	0.43 (0.364-0.499)	0.349 (0.299-0.402)	0.351 (0.319-0.384)	0.393 (0.297-0.495)	0.283 (0.233-0.337)	0.381 (0.314-0.452)	0.355 (0.326-0.384)	0.359 (0.333-0.386)	0.367 (0.32-0.417)	0.332 (0.286-0.38)	passed	0.1507	no		0.29
97	rs4307711	11	11548812	Novel	6.265e-05	T	0.199 (0.179-0.221)	0.165 (0.154-0.176)	0.201 (0.172-0.232)	0.202 (0.151-0.262)	0.2 (0.149-0.26)	0.197 (0.157-0.243)	0.17 (0.146-0.197)	0.138 (0.078-0.22)	0.184 (0.142-0.232)	0.137 (0.093-0.192)	0.175 (0.153-0.2)	0.157 (0.138-0.178)	0.173 (0.137-0.213)	0.163 (0.128-0.203)	passed	0.1266	no		0.45
98	rs7126124	11	35718630	Novel	7.669e-05	G	0.158 (0.14-0.178)	0.124 (0.114-0.134)	0.159 (0.133-0.188)	0.147 (0.103-0.201)	0.15 (0.106-0.205)	0.176 (0.138-0.221)	0.125 (0.104-0.149)	0.118 (0.062-0.198)	0.092 (0.062-0.131)	0.097 (0.06-0.146)	0.139 (0.119-0.162)	0.126 (0.108-0.145)	0.106 (0.078-0.141)	0.12 (0.09-0.156)	passed	0.3106	no		0.55
99	rs11229030	11	56959585	Novel	4.005e-05	G	0.349 (0.325-0.374)	0.295 (0.282-0.308)	0.325 (0.291-0.361)	0.436 (0.369-0.505)	0.315 (0.254-0.382)	0.337 (0.287-0.389)	0.316 (0.285-0.348)	0.275 (0.191-0.373)	0.302 (0.251-0.357)	0.29 (0.229-0.358)	0.28 (0.254-0.308)	0.305 (0.28-0.331)	0.314 (0.269-0.362)	0.248 (0.206-0.293)	passed	0.0002111	yes	8.45456e-09	0.71
100	rs9943597	11	63081777	PRDX5/ESRRA	9.678e-06	C	0.449 (0.424-0.475)	0.391 (0.377-0.406)	0.46 (0.423-0.497)	0.367 (0.303-0.435)	0.47 (0.403-0.539)	0.419 (0.366-0.473)	0.387 (0.354-0.421)	0.344 (0.252-0.445)	0.355 (0.301-0.412)	0.432 (0.363-0.504)	0.391 (0.362-0.421)	0.4 (0.373-0.427)	0.389 (0.341-0.439)	0.396 (0.348-0.446)	passed	0.10215	no		0.098
100	rs11231525	11	63110618	PRDX5/ESRRA	5.137e-05	G	0.316 (0.293-0.341)	0.276 (0.263-0.289)	0.306 (0.272-0.341)	0.271 (0.213-0.335)	0.395 (0.33-0.464)	0.331 (0.281-0.383)	0.267 (0.237-0.297)	0.275 (0.191-0.373)	0.245 (0.197-0.297)	0.324 (0.26-0.394)	0.268 (0.242-0.296)	0.302 (0.278-0.328)	0.237 (0.196-0.281)	0.268 (0.225-0.314)	passed	0.4507	no		0.97
101	rs639768	11	74401204	Novel	7.729e-05	T	0.266 (0.244-0.29)	0.334 (0.32-0.348)	0.274 (0.241-0.308)	0.239 (0.184-0.301)	0.285 (0.227-0.35)	0.291 (0.244-0.342)	0.328 (0.297-0.361)	0.295 (0.208-0.393)	0.352 (0.298-0.408)	0.364 (0.298-0.435)	0.337 (0.309-0.366)	0.345 (0.319-0.371)	0.325 (0.28-0.374)	0.291 (0.247-0.338)	passed	0.10875	no		0.032
102	rs10501826	11	94739512	Novel	6.312e-05	G	0.36 (0.336-0.386)	0.308 (0.295-0.322)	0.357 (0.322-0.394)	0.386 (0.321-0.454)	0.36 (0.297-0.428)	0.367 (0.316-0.42)	0.306 (0.275-0.338)	0.314 (0.225-0.414)	0.264 (0.215-0.317)	0.307 (0.244-0.376)	0.315 (0.287-0.344)	0.301 (0.276-0.327)	0.342 (0.296-0.391)	0.32 (0.275-0.369)	passed	0.0027245	yes	1.7197e-07	not assayed
103	rs7487539	12	5452380	Novel	1.199e-05	G	0.193 (0.174-0.215)	0.241 (0.229-0.254)	0.187 (0.159-0.217)	0.234 (0.18-0.297)	0.17 (0.123-0.227)	0.188 (0.149-0.234)	0.264 (0.235-0.295)	0.187 (0.117-0.276)	0.275 (0.226-0.329)	0.199 (0.147-0.261)	0.238 (0.212-0.264)	0.228 (0.206-0.252)	0.242 (0.201-0.287)	0.265 (0.222-0.311)	passed	0.0728	no		not assayed
104	rs12319902	12	102518056	Novel	5.41e-05	T	0.087 (0.074-0.103)	0.053 (0.047-0.06)	0.083 (0.064-0.106)	0.088 (0.054-0.133)	0.13 (0.089-0.183)	0.073 (0.048-0.106)	0.05 (0.036-0.066)	0.079 (0.034-0.151)	0.031 (0.015-0.058)	0.04 (0.018-0.077)	0.056 (0.043-0.072)	0.056 (0.044-0.07)	0.059 (0.038-0.087)	0.05 (0.031-0.076)	passed	0.14205	no		0.69
105	rs4772637	13	104100944	Novel	1.693e-05	G	0.276 (0.254-0.3)	0.228 (0.216-0.241)	0.25 (0.219-0.284)	0.318 (0.257-0.384)	0.335 (0.273-0.402)	0.3 (0.253-0.352)	0.222 (0.194-0.251)	0.187 (0.117-0.276)	0.241 (0.194-0.293)	0.239 (0.182-0.304)	0.241 (0.215-0.267)	0.225 (0.202-0.249)	0.225 (0.185-0.27)	0.216 (0.176-0.259)	passed	0.0515	no		not assayed
106	rs1158543	14	40443249	Novel	6.818e-05	C	0.256 (0.234-0.28)	0.293 (0.279-0.306)	0.232 (0.201-0.264)	0.317 (0.256-0.383)	0.2 (0.149-0.26)	0.303 (0.255-0.355)	0.282 (0.252-0.313)	0.373 (0.279-0.475)	0.218 (0.173-0.269)	0.341 (0.276-0.411)	0.302 (0.275-0.33)	0.289 (0.265-0.315)	0.298 (0.253-0.345)	0.294 (0.25-0.341)	failed				not assayed
107	rs227444	14	69513287	Novel	3.657e-05	A	0.336 (0.312-0.361)	0.287 (0.274-0.301)	0.307 (0.274-0.342)	0.331 (0.269-0.398)	0.29 (0.231-0.356)	0.407 (0.354-0.46)	0.328 (0.297-0.361)	0.246 (0.166-0.341)	0.294 (0.244-0.349)	0.245 (0.187-0.31)	0.289 (0.262-0.317)	0.264 (0.241-0.289)	0.306 (0.261-0.354)	0.285 (0.242-0.332)	failed				0.42
108	rs178452	14	79513032	Novel	1.772e-05	A	0.184 (0.165-0.205)	0.209 (0.197-0.221)	0.178 (0.151-0.208)	0.202 (0.151-0.262)	0.165 (0.119-0.222)	0.134 (0.1-0.174)	0.199 (0.173-0.228)	0.226 (0.149-0.319)	0.237 (0.19-0.289)	0.211 (0.156-0.274)	0.195 (0.172-0.22)	0.216 (0.194-0.239)	0.209 (0.17-0.252)	0.216 (0.176-0.259)	failed				0.65
109	rs2295214	14	93562288	Novel	6.382e-05	G	0.184 (0.165-0.205)	0.233 (0.22-0.245)	0.178 (0.151-0.208)	0.198 (0.147-0.257)	0.19 (0.14-0.249)	0.167 (0.129-0.211)	0.227 (0.2-0.257)	0.197 (0.125-0.287)	0.203 (0.159-0.253)	0.222 (0.167-0.286)	0.227 (0.203-0.254)	0.269 (0.245-0.294)	0.209 (0.17-0.252)	0.192 (0.155-0.235)	passed	0.1993	no		not assayed
110	rs1841441	15	37167818	Novel	6.842e-05	G	0.461 (0.436-0.487)	0.49 (0.476-0.505)	0.479 (0.442-0.517)	0.45 (0.383-0.519)	0.465 (0.398-0.534)	0.407 (0.354-0.46)	0.47 (0.436-0.504)	0.491 (0.39-0.592)	0.493 (0.435-0.551)	0.489 (0.418-0.56)	0.5 (0.469-0.53)	0.5 (0.473-0.528)	0.467 (0.417-0.517)	0.468 (0.419-0.519)	failed				0.21
111	rs11631392	15	87131578	Novel	1.186e-05	A	0.169 (0.151-0.19)	0.217 (0.205-0.23)	0.156 (0.13-0.185)	0.189 (0.139-0.247)	0.13 (0.089-0.183)	0.191 (0.151-0.237)	0.19 (0.164-0.217)	0.128 (0.07-0.209)	0.271 (0.222-0.325)	0.25 (0.192-0.316)	0.235 (0.21-0.261)	0.231 (0.209-0.255)	0.181 (0.145-0.222)	0.169 (0.134-0.21)	passed	0.3119	no		not assayed
112	rs10520798	15	93833895	Novel	5.679e-05	G	0.097 (0.083-0.114)	0.069 (0.062-0.077)	0.103 (0.081-0.127)	0.092 (0.057-0.139)	0.11 (0.072-0.16)	0.091 (0.063-0.127)	0.072 (0.056-0.091)	0.059 (0.021-0.126)	0.081 (0.053-0.117)	0.063 (0.034-0.106)	0.074 (0.059-0.092)	0.066 (0.053-0.081)	0.053 (0.033-0.08)	0.067 (0.045-0.097)	passed	0.0022115	yes	1.25591e-07	0.2
113	rs2123930	15	98048556	Novel	4.782e-05	T	0.254 (0.232-0.278)	0.295 (0.282-0.308)	0.24 (0.209-0.273)	0.264 (0.207-0.328)	0.21 (0.158-0.271)	0.264 (0.218-0.314)	0.275 (0.245-0.306)	0.275 (0.191-0.373)	0.26 (0.211-0.313)	0.307 (0.244-0.376)	0.324 (0.296-0.353)	0.284 (0.26-0.31)	0.295 (0.251-0.342)	0.309 (0.264-0.356)	passed	0.1097	no		not assayed
114	rs936111	15	99376659	Novel	2.905e-05	G	0.192 (0.173-0.214)	0.154 (0.143-0.164)	0.206 (0.177-0.238)	0.179 (0.131-0.237)	0.175 (0.127-0.233)	0.2 (0.16-0.247)	0.167 (0.143-0.194)	0.108 (0.055-0.187)	0.176 (0.135-0.224)	0.125 (0.083-0.179)	0.159 (0.138-0.183)	0.132 (0.114-0.151)	0.192 (0.155-0.234)	0.16 (0.126-0.2)	passed	0.0885	no		0.94
115	rs2080501	16	48201067	NOD2	1.04e-05	A	0.469 (0.444-0.495)	0.41 (0.396-0.425)	0.457 (0.42-0.494)	0.468 (0.401-0.537)	0.5 (0.432-0.569)	0.461 (0.408-0.515)	0.411 (0.378-0.445)	0.422 (0.325-0.524)	0.39 (0.334-0.447)	0.432 (0.363-0.504)	0.398 (0.369-0.428)	0.417 (0.39-0.445)	0.406 (0.358-0.456)	0.431 (0.382-0.481)	passed	0.00768	yes	7.9872e-08	0.52
115	rs2080498	16	48478809	NOD2	2.554e-05	T	0.051 (0.041-0.064)	0.078 (0.07-0.086)	0.059 (0.043-0.079)	0.06 (0.032-0.101)	0.06 (0.033-0.101)	0.016 (0.005-0.035)	0.073 (0.057-0.093)	0.099 (0.049-0.173)	0.084 (0.056-0.122)	0.063 (0.034-0.106)	0.078 (0.063-0.096)	0.068 (0.055-0.083)	0.089 (0.063-0.122)	0.105 (0.077-0.14)	passed	0.0023575	yes	6.02106e-08	0.97
115	rs17289102	16	48900159	NOD2	2.249e-11	A	0.375 (0.351-0.401)	0.302 (0.289-0.316)	0.409 (0.373-0.447)	0.312 (0.251-0.379)	0.435 (0.369-0.504)	0.364 (0.313-0.417)	0.311 (0.281-0.344)	0.353 (0.261-0.455)	0.275 (0.226-0.329)	0.341 (0.276-0.411)	0.282 (0.255-0.31)	0.295 (0.27-0.321)	0.295 (0.251-0.342)	0.364 (0.317-0.413)	passed	6.465e-06	yes	1.45398e-16	2.9e-09
115	rs9922362	16	48913242	NOD2	8.069e-17	T	0.414 (0.389-0.44)	0.32 (0.307-0.334)	0.447 (0.41-0.485)	0.335 (0.273-0.402)	0.495 (0.427-0.564)	0.41 (0.357-0.463)	0.33 (0.298-0.362)	0.373 (0.279-0.475)	0.283 (0.233-0.337)	0.358 (0.292-0.429)	0.297 (0.27-0.326)	0.321 (0.296-0.348)	0.309 (0.264-0.357)	0.373 (0.325-0.422)	passed	3.8325e-07	yes	3.09244e-23	7.4e-10
115	rs2076756	16	49314382	NOD2	2.317e-20	G	0.367 (0.343-0.393)	0.248 (0.235-0.261)	0.338 (0.303-0.374)	0.349 (0.286-0.417)	0.455 (0.388-0.524)	0.407 (0.354-0.46)	0.244 (0.216-0.274)	0.236 (0.157-0.33)	0.245 (0.197-0.297)	0.262 (0.203-0.328)	0.263 (0.237-0.291)	0.249 (0.226-0.273)	0.2 (0.162-0.243)	0.245 (0.203-0.29)	passed	5.87e-18	yes	1.36e-37	4e-69
115	rs16948851	16	49400910	NOD2	7.791e-08	G	0.159 (0.141-0.179)	0.117 (0.108-0.127)	0.146 (0.121-0.174)	0.152 (0.107-0.207)	0.15 (0.106-0.205)	0.185 (0.146-0.23)	0.101 (0.082-0.123)	0.089 (0.042-0.161)	0.111 (0.078-0.152)	0.137 (0.093-0.192)	0.128 (0.109-0.15)	0.123 (0.105-0.142)	0.117 (0.087-0.153)	0.099 (0.072-0.133)	passed	6.37e-07	yes	4.96287e-14	not assayed
116	rs11574514	16	66528881	Novel	8.046e-05	A	0.069 (0.057-0.084)	0.055 (0.048-0.062)	0.073 (0.055-0.094)	0.068 (0.038-0.11)	0.065 (0.036-0.107)	0.064 (0.041-0.095)	0.048 (0.035-0.065)	0.02 (0.003-0.07)	0.039 (0.02-0.067)	0.04 (0.018-0.077)	0.064 (0.05-0.08)	0.063 (0.051-0.078)	0.045 (0.027-0.07)	0.047 (0.029-0.073)	passed	0.002593	yes	2.08633e-07	not assayed
117	rs9927563	16	86988400	Novel	6.102e-05	T	0.406 (0.381-0.432)	0.353 (0.339-0.367)	0.436 (0.399-0.473)	0.34 (0.277-0.407)	0.5 (0.432-0.569)	0.367 (0.316-0.42)	0.379 (0.346-0.412)	0.471 (0.371-0.573)	0.298 (0.247-0.353)	0.336 (0.271-0.405)	0.355 (0.326-0.384)	0.312 (0.287-0.338)	0.381 (0.333-0.431)	0.416 (0.367-0.466)	failed				not assayed
118	rs10491101	17	12530152	Novel	3.77e-05	A	0.04 (0.031-0.052)	0.019 (0.015-0.024)	0.033 (0.021-0.049)	0.042 (0.019-0.078)	0.035 (0.015-0.07)	0.046 (0.026-0.074)	0.027 (0.017-0.04)	0 (0-0.036)	0.027 (0.012-0.052)	0.012 (0.002-0.039)	0.013 (0.007-0.021)	0.014 (0.008-0.022)	0.031 (0.016-0.053)	0.032 (0.017-0.055)	passed	0.0043345	yes	1.63411e-07	not assayed
119	rs1029719	17	29574977	CCL2/CCL7	8.465e-05	A	0.429 (0.404-0.455)	0.371 (0.357-0.386)	0.416 (0.38-0.454)	0.409 (0.343-0.477)	0.4 (0.335-0.469)	0.476 (0.423-0.53)	0.381 (0.349-0.415)	0.353 (0.261-0.455)	0.371 (0.316-0.428)	0.415 (0.346-0.487)	0.359 (0.33-0.388)	0.354 (0.328-0.38)	0.398 (0.349-0.448)	0.407 (0.359-0.457)	passed	0.05035	no		0.0034
119	rs3091316	17	29618087	CCL2/CCL7	1.925e-05	T	0.241 (0.22-0.264)	0.302 (0.289-0.316)	0.253 (0.221-0.286)	0.244 (0.188-0.306)	0.225 (0.172-0.287)	0.249 (0.204-0.298)	0.297 (0.267-0.329)	0.304 (0.217-0.404)	0.321 (0.269-0.377)	0.273 (0.213-0.34)	0.312 (0.285-0.341)	0.312 (0.287-0.338)	0.278 (0.235-0.325)	0.271 (0.228-0.317)	passed	0.00202	yes	3.89e-08	2.2e-13
120	rs16522	17	34570514	GSMDL, ZPBP2, ORMDL3, IKZF3	4.112e-05	G	0.094 (0.08-0.111)	0.126 (0.116-0.136)	0.118 (0.095-0.144)	0.065 (0.036-0.107)	0.015 (0.004-0.043)	0.116 (0.084-0.154)	0.138 (0.115-0.163)	0.03 (0.005-0.087)	0.149 (0.111-0.195)	0.097 (0.06-0.146)	0.136 (0.116-0.158)	0.111 (0.095-0.129)	0.145 (0.112-0.183)	0.125 (0.095-0.162)	failed				0.32
121	rs2331499	17	48169092	Novel	3.748e-05	T	0.471 (0.446-0.497)	0.469 (0.455-0.484)	0.46 (0.423-0.497)	0.459 (0.392-0.528)	0.475 (0.408-0.544)	0.467 (0.414-0.521)	0.485 (0.451-0.519)	0.481 (0.381-0.582)	0.497 (0.439-0.555)	0.455 (0.385-0.526)	0.446 (0.416-0.476)	0.483 (0.456-0.511)	0.467 (0.417-0.517)	0.448 (0.399-0.498)	passed	0.30055	no		0.17
122	rs2271608	17	76514053	Novel	7.395e-05	A	0.117 (0.102-0.135)	0.137 (0.127-0.147)	0.094 (0.074-0.118)	0.156 (0.111-0.212)	0.12 (0.08-0.171)	0.107 (0.076-0.144)	0.118 (0.097-0.142)	0.197 (0.125-0.287)	0.126 (0.091-0.169)	0.154 (0.107-0.211)	0.167 (0.145-0.191)	0.117 (0.1-0.135)	0.142 (0.109-0.18)	0.123 (0.092-0.159)	passed	0.1924	no		0.99
123	rs7406561	17	78639011	Novel	8.026e-06	A	0.464 (0.439-0.49)	0.489 (0.474-0.504)	0.428 (0.392-0.465)	0.433 (0.366-0.502)	0.43 (0.364-0.499)	0.491 (0.438-0.545)	0.496 (0.462-0.53)	0.481 (0.381-0.582)	0.47 (0.413-0.528)	0.495 (0.424-0.566)	0.494 (0.464-0.524)	0.456 (0.429-0.483)	0.475 (0.426-0.526)	0.474 (0.424-0.525)	passed	0.01351	yes	1.08431e-07	not assayed
124	rs7231736	18	831321	Novel	2.57e-06	G	0.499 (0.474-0.525)	0.445 (0.43-0.459)	0.482 (0.445-0.52)	0.487 (0.419-0.555)	0.5 (0.432-0.569)	0.467 (0.414-0.521)	0.461 (0.428-0.495)	0.432 (0.334-0.534)	0.386 (0.331-0.444)	0.444 (0.374-0.515)	0.445 (0.415-0.475)	0.448 (0.421-0.476)	0.459 (0.409-0.509)	0.434 (0.384-0.484)	passed	0.4035	no		0.075
125	rs9948310	18	22390252	Novel	1.587e-05	G	0.158 (0.14-0.178)	0.113 (0.104-0.123)	0.162 (0.135-0.191)	0.175 (0.127-0.232)	0.2 (0.149-0.26)	0.107 (0.076-0.144)	0.112 (0.092-0.135)	0.089 (0.042-0.161)	0.1 (0.068-0.139)	0.103 (0.065-0.153)	0.118 (0.099-0.139)	0.122 (0.105-0.141)	0.095 (0.068-0.128)	0.111 (0.082-0.146)	passed	0.1039	no		0.38
126	rs11082289	18	38480940	Novel	9.625e-05	C	0.186 (0.167-0.207)	0.225 (0.213-0.238)	0.188 (0.16-0.219)	0.193 (0.143-0.252)	0.19 (0.14-0.249)	0.152 (0.116-0.194)	0.216 (0.189-0.245)	0.246 (0.166-0.341)	0.275 (0.226-0.329)	0.216 (0.162-0.28)	0.204 (0.18-0.229)	0.225 (0.202-0.249)	0.242 (0.201-0.287)	0.256 (0.214-0.302)	passed	0.3606	no		not assayed
126	rs8084832	18	38503024	Novel	5.002e-05	A	0.207 (0.187-0.229)	0.247 (0.234-0.259)	0.205 (0.176-0.236)	0.225 (0.172-0.287)	0.21 (0.158-0.271)	0.164 (0.127-0.207)	0.241 (0.213-0.271)	0.265 (0.182-0.362)	0.279 (0.229-0.333)	0.239 (0.182-0.304)	0.23 (0.205-0.257)	0.243 (0.22-0.267)	0.259 (0.217-0.305)	0.282 (0.239-0.329)	passed	0.42945	no		0.83
127	rs7244908	18	73226082	Novel	8.663e-06	A	0.287 (0.265-0.311)	0.333 (0.319-0.347)	0.293 (0.26-0.328)	0.326 (0.264-0.393)	0.205 (0.154-0.265)	0.285 (0.238-0.336)	0.327 (0.296-0.359)	0.216 (0.141-0.309)	0.405 (0.349-0.463)	0.307 (0.244-0.376)	0.327 (0.299-0.356)	0.336 (0.311-0.363)	0.364 (0.317-0.414)	0.309 (0.264-0.356)	passed	0.3843	no		not assayed
128	rs3752174	19	2465565	Novel	8.024e-05	A	0.25 (0.229-0.273)	0.288 (0.275-0.302)	0.25 (0.218-0.283)	0.299 (0.239-0.364)	0.16 (0.114-0.216)	0.264 (0.218-0.314)	0.286 (0.256-0.318)	0.167 (0.101-0.254)	0.283 (0.233-0.337)	0.324 (0.26-0.394)	0.286 (0.259-0.314)	0.287 (0.262-0.312)	0.303 (0.259-0.351)	0.314 (0.269-0.363)	passed	0.20945	no		not assayed
129	rs9749591	19	34216611	Novel	3.99e-05	T	0.053 (0.043-0.066)	0.031 (0.026-0.036)	0.045 (0.031-0.063)	0.078 (0.046-0.123)	0.06 (0.033-0.101)	0.049 (0.029-0.077)	0.03 (0.02-0.044)	0.03 (0.005-0.087)	0.031 (0.015-0.058)	0.006 (0.001-0.03)	0.035 (0.024-0.047)	0.035 (0.026-0.047)	0.042 (0.025-0.067)	0.009 (0.002-0.025)	passed	0.058	no		not assayed
130	rs481412	19	39291648	Novel	7.526e-05	T	0.352 (0.328-0.378)	0.294 (0.281-0.308)	0.355 (0.32-0.391)	0.377 (0.312-0.445)	0.31 (0.25-0.377)	0.364 (0.313-0.417)	0.293 (0.263-0.325)	0.255 (0.174-0.352)	0.268 (0.219-0.321)	0.324 (0.26-0.394)	0.295 (0.268-0.324)	0.297 (0.272-0.322)	0.314 (0.269-0.362)	0.282 (0.239-0.329)	failed				0.34
131	rs4802522	19	54102003	FUT2/RASIP1	9.116e-05	A	0.336 (0.312-0.361)	0.285 (0.272-0.298)	0.351 (0.316-0.387)	0.335 (0.273-0.402)	0.365 (0.301-0.433)	0.31 (0.261-0.361)	0.293 (0.263-0.325)	0.344 (0.252-0.445)	0.294 (0.244-0.349)	0.302 (0.239-0.37)	0.277 (0.251-0.305)	0.274 (0.25-0.299)	0.262 (0.219-0.308)	0.32 (0.275-0.369)	passed	0.27175	no		0.41
132	rs4815837	20	5473648	Novel	4.575e-05	A	0.037 (0.028-0.048)	0.056 (0.05-0.063)	0.034 (0.022-0.05)	0.037 (0.016-0.072)	0.02 (0.006-0.05)	0.037 (0.02-0.062)	0.055 (0.041-0.072)	0.03 (0.005-0.087)	0.077 (0.05-0.113)	0.052 (0.025-0.092)	0.063 (0.049-0.079)	0.045 (0.034-0.058)	0.067 (0.045-0.096)	0.067 (0.045-0.097)	passed	0.47685	no		0.57
133	rs6040146	20	10701237	Novel	6.158e-05	A	0.234 (0.213-0.257)	0.196 (0.185-0.208)	0.243 (0.212-0.276)	0.221 (0.168-0.282)	0.245 (0.19-0.308)	0.225 (0.182-0.272)	0.211 (0.184-0.239)	0.246 (0.166-0.341)	0.176 (0.135-0.224)	0.228 (0.172-0.292)	0.176 (0.154-0.2)	0.208 (0.186-0.231)	0.181 (0.145-0.222)	0.192 (0.155-0.235)	passed	0.33255	no		0.9
134	rs2425076	20	33758663	Novel	3.405e-05	A	0.069 (0.057-0.084)	0.05 (0.044-0.057)	0.079 (0.06-0.101)	0.088 (0.054-0.133)	0.08 (0.048-0.125)	0.064 (0.041-0.095)	0.059 (0.045-0.077)	0.02 (0.003-0.07)	0.058 (0.034-0.09)	0.063 (0.034-0.106)	0.052 (0.039-0.066)	0.044 (0.034-0.057)	0.056 (0.036-0.083)	0.038 (0.022-0.062)	passed	0.27515	no		0.46
134	rs6060787	20	34135923	Novel	8.348e-05	A	0.073 (0.061-0.088)	0.054 (0.047-0.061)	0.086 (0.066-0.109)	0.069 (0.04-0.111)	0.065 (0.036-0.107)	0.064 (0.041-0.095)	0.059 (0.045-0.077)	0.02 (0.003-0.07)	0.065 (0.04-0.099)	0.074 (0.042-0.12)	0.053 (0.041-0.069)	0.049 (0.038-0.062)	0.056 (0.036-0.083)	0.047 (0.029-0.073)	passed	0.000888	yes	7.41302e-08	0.64
135	rs11906361	20	45366539	Novel	3.347e-07	G	0.102 (0.087-0.119)	0.152 (0.142-0.163)	0.105 (0.084-0.13)	0.124 (0.084-0.176)	0.005 (0.001-0.027)	0.134 (0.1-0.174)	0.156 (0.132-0.182)	0.02 (0.003-0.07)	0.172 (0.131-0.22)	0.148 (0.102-0.205)	0.148 (0.127-0.171)	0.149 (0.13-0.17)	0.167 (0.132-0.207)	0.169 (0.134-0.21)	passed	0.11745	no		0.0024
136	rs3952	22	36786544	Novel	6.183e-05	G	0.263 (0.241-0.287)	0.299 (0.286-0.313)	0.255 (0.224-0.289)	0.28 (0.222-0.345)	0.19 (0.14-0.249)	0.27 (0.224-0.32)	0.296 (0.266-0.328)	0.206 (0.133-0.298)	0.321 (0.269-0.377)	0.319 (0.255-0.388)	0.303 (0.276-0.332)	0.304 (0.279-0.33)	0.278 (0.235-0.325)	0.297 (0.253-0.344)	passed	0.06005	no		0.8
137	rs9614390	22	42965544	Novel	1.969e-05	A	0.155 (0.137-0.175)	0.202 (0.19-0.214)	0.148 (0.122-0.176)	0.147 (0.103-0.201)	0.195 (0.145-0.254)	0.14 (0.105-0.181)	0.197 (0.171-0.225)	0.216 (0.141-0.309)	0.195 (0.152-0.245)	0.182 (0.132-0.243)	0.195 (0.172-0.22)	0.217 (0.195-0.241)	0.189 (0.152-0.231)	0.201 (0.163-0.244)	passed	0.14805	no		0.87
137	rs3213550	22	43512004	Novel	5.321e-05	A	0.075 (0.063-0.09)	0.103 (0.095-0.113)	0.071 (0.053-0.092)	0.065 (0.036-0.107)	0.055 (0.029-0.095)	0.076 (0.051-0.109)	0.101 (0.082-0.123)	0.079 (0.034-0.151)	0.115 (0.081-0.156)	0.097 (0.06-0.146)	0.095 (0.078-0.114)	0.126 (0.108-0.145)	0.087 (0.061-0.119)	0.073 (0.05-0.103)	failed				not assayed
